# Supplementary material
Source: Research Square preprint supplement (doi:10.21203/rs.3.rs-8242447/v1)
Supplement: Supplementary file 1 [file 94ea167784951318622ae110.docx]

**Supplementary Materials**

**Supplementary Figure 1.** Flowchart of ctDNA collection and sequencing.

**Supplementary Figure 2.** Association of genetic mutations with baseline clinicopathological characteristics.

**Supplementary Figure 3.** Association of gene alternations with PFS and OS.

**Supplementary Figure 4.** Association of mTBI level with treatment efficacy.

**Supplementary Figure 5.** The multivariate COX analysis of baseline characteristics and mTBI status in placebo group.

**Supplementary Figure 6.** Kaplan-Meier plots by PI3K pathwaystatus in bireociclib and placebo group.

**Supplementary Figure 7.** Kaplan-Meier plots by MYC pathwaystatus in bireociclib and placebo group.

**Supplementary Figure 8.** Kaplan-Meier plots by *gBRCA*-included HRRm status in bireociclib and placebo group.

**Supplementary Figure 9.** Kaplan-Meier plots by *gBRCA* or non-gBRCA-included HRRm status in bireociclib and placebo group.

**Supplementary Figure 10.** Interaction analysis between *PIK3CA/ESR1* co-mutation status and treatment for PFS.

**Supplementary Figure 11.** Interaction analysis between *ESR1* mutation status and treatment in all *PIK3CA*-mutation patients for PFS.

**Supplementary Figure 12.** Kaplan-Meier plots of dynamic ctDNA status for survival outcomes in placebo group.

**Supplementary Figure 13.** Kaplan-Meier plots of PFS in patients treated with bireociclib versus placebo, categorized by dynamic changes in ctDNA status.

**Supplementary Figure 14.** Kaplan-Meier plots of dynamic mTBI change for survival outcomes in placebo group.

**Supplementary Figure 15.** Associations between dynamic *PIK3CA* and *ESR1* status with survival outcomes in placebo group.

**Supplementary Figure 16.** The mutation frequency of each gene across three time points in placebo group.

**Supplementary Figure 17.** Gene heatmap of longitudinal paired (C1D1, C5D1, EOT) samples in bireociclib group.

**Supplementary Figure 18.** Gene heatmap of longitudinal paired (C1D1, C5D1, EOT) samples in palcebo group.

**Supplementary Table 1.** 1021 Gene list and the targeted regions.

**Supplementary Table 2.** Clinicopathologic features and survival outcomes in ITT and ctDNA-evaluable populations.

**Supplementary Table 3.** The univariate COX analysis of baseline characteristics and mTBI for PFS in bireociclib group.

**Supplementary Table 4.** The univariate COX analysis of baseline characteristics and mTBI for PFS in placebo group.

**Supplementary Figure 1. Flowchart of ctDNA collection and sequencing.**


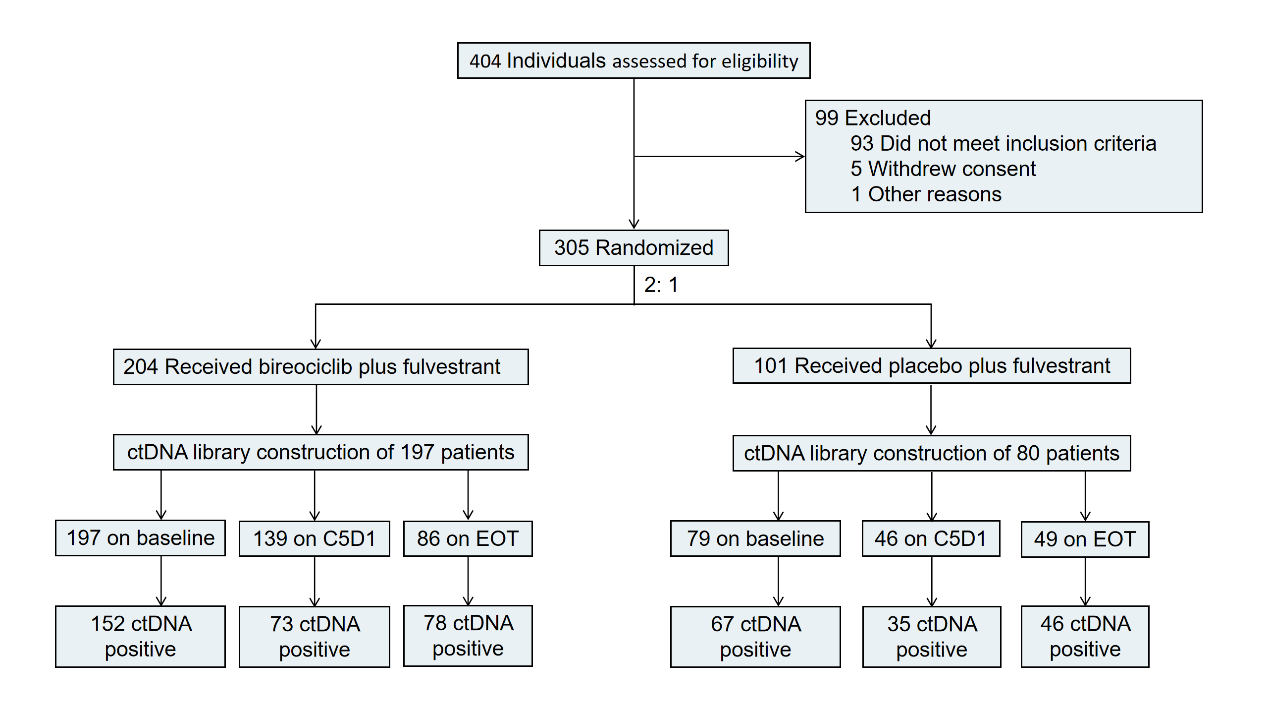


Abbreviations: ctDNA, circulating tumor DNA; C5D1, day 1 of cycle 5; EOT, end of treatment.

**Supplementary Figure 2. Association of genetic mutations with baseline clinicopathological characteristics.**


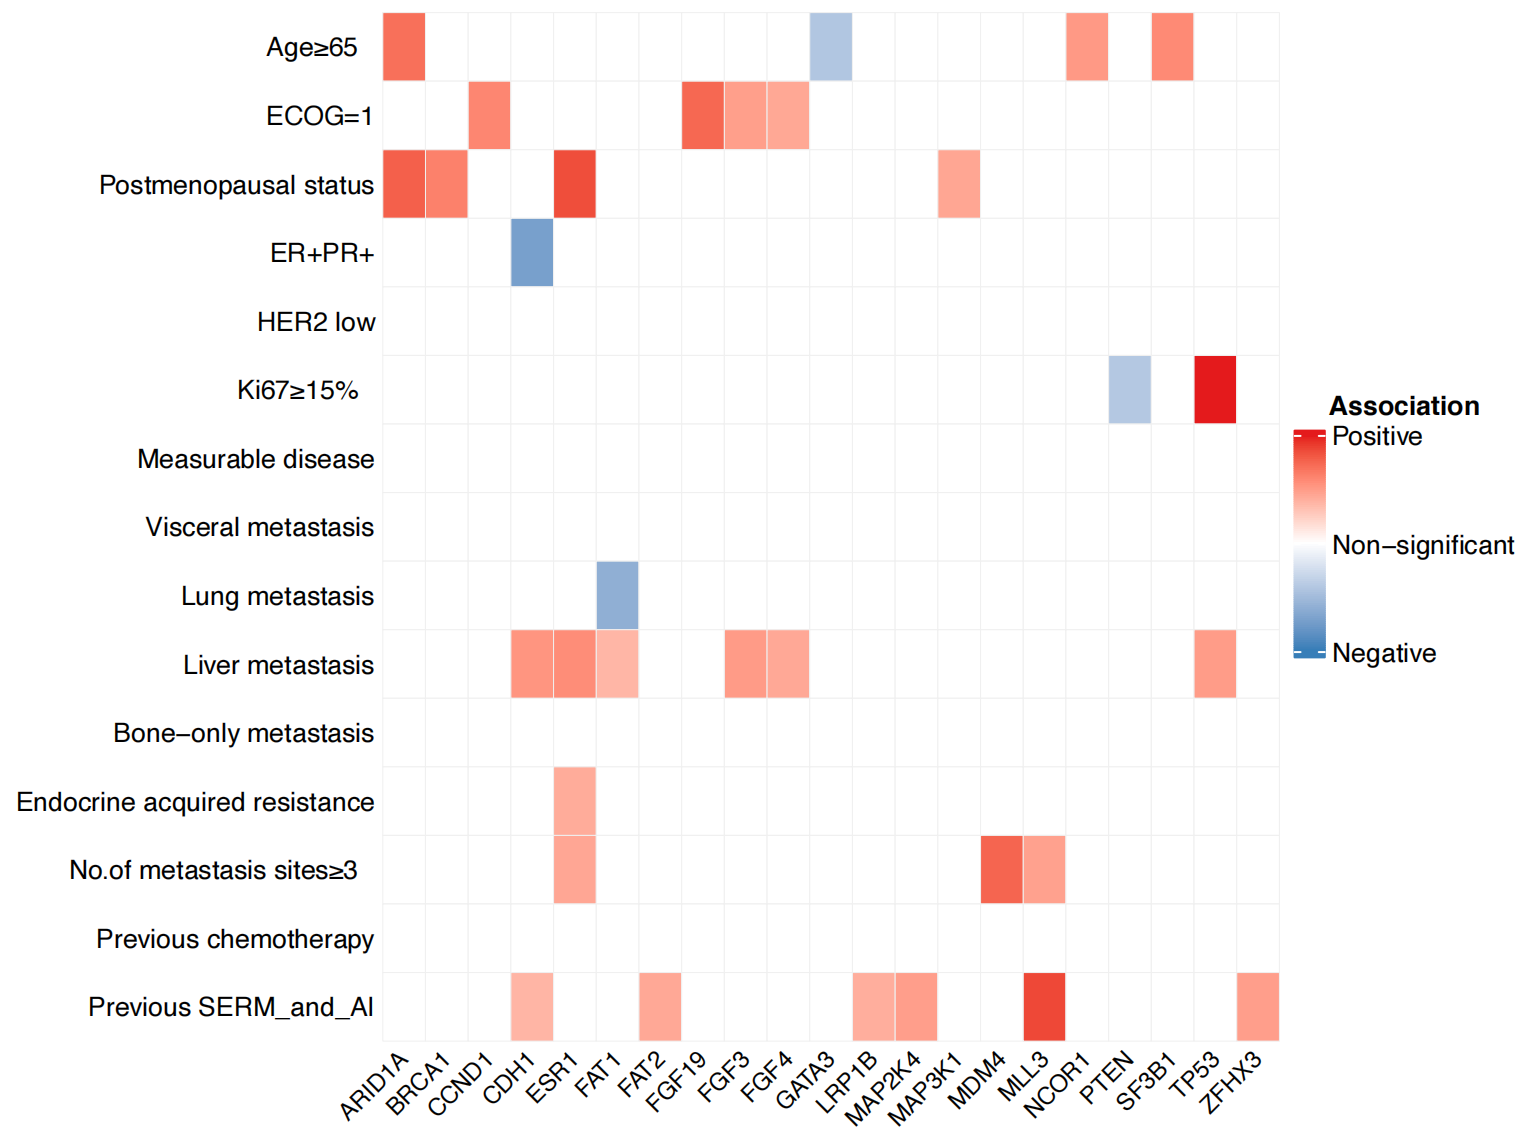


Abbreviations: ECOG, Eastern Cooperative Oncology Group; ER, estrogen receptor; PR, progesterone receptor; HER2, human epidermal growth factor receptor 2; SERM, selective estrogen receptor modulator; AI, aromatase inhibitor.

**Supplementary Figure 3.** **Association of gene alternations with PFS and OS.**

1. Association of gene alternations with PFS in bireociclib group. (B) Association of gene alternations with PFS in placebo group. (C) Association of gene alternations with OS in bireociclib group. (D) Association of gene alternations with OS in placebo group.


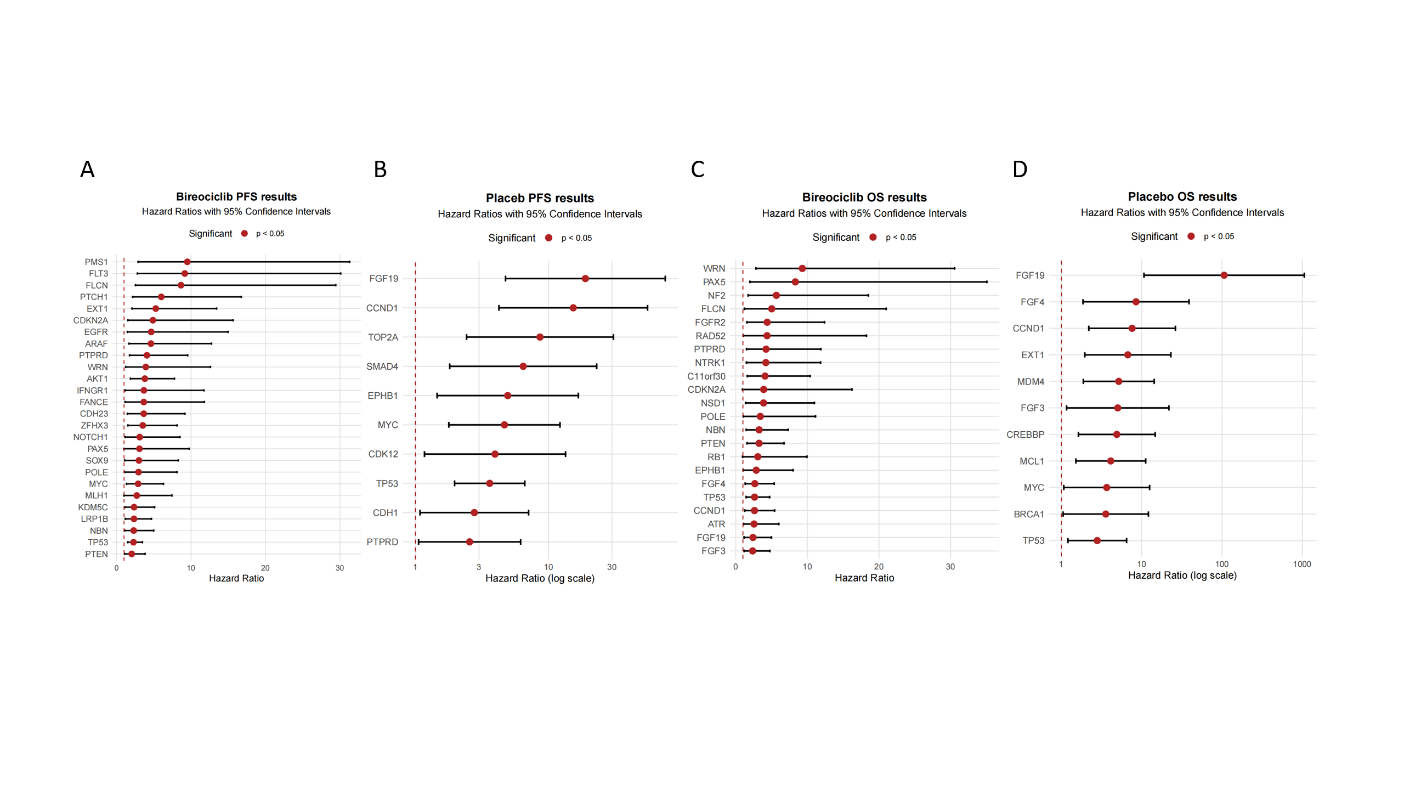


Abbreviations: PFS, progression-free survival; OS, overall survival.

**Supplementary Figure 4. Association of mTBI level with treatment efficacy.**

(A) Association of mTBI level with treatment efficacy in bireociclib group. (B) Association of mTBI level with treatment efficacy in placebo group.


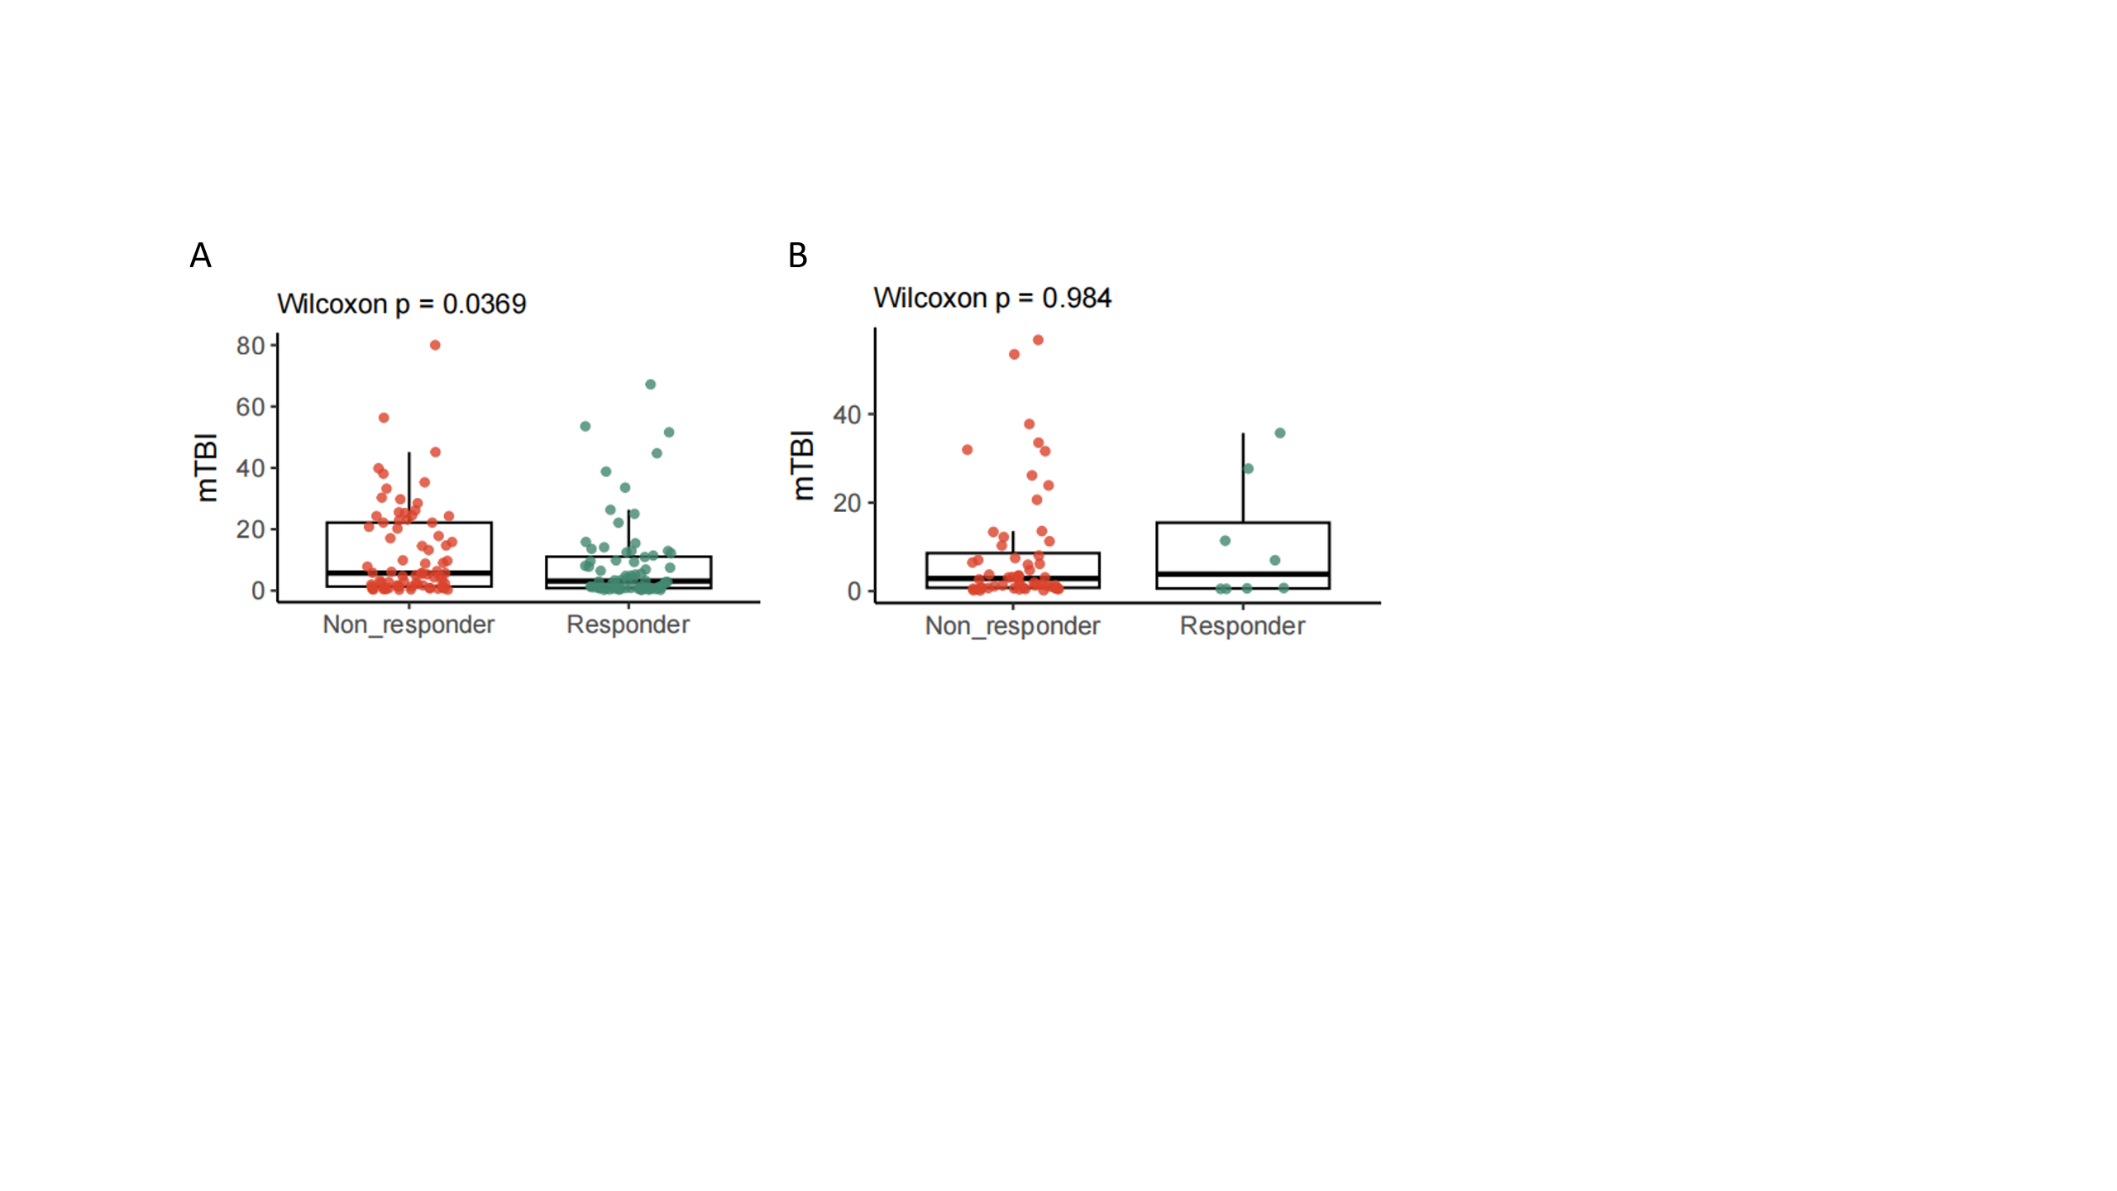


Abbreviations: mTBI, molecular tumor burden index.

**Supplementary Figure 5. The multivariate COX analysis of baseline characteristics and mTBI status in placebo group.**


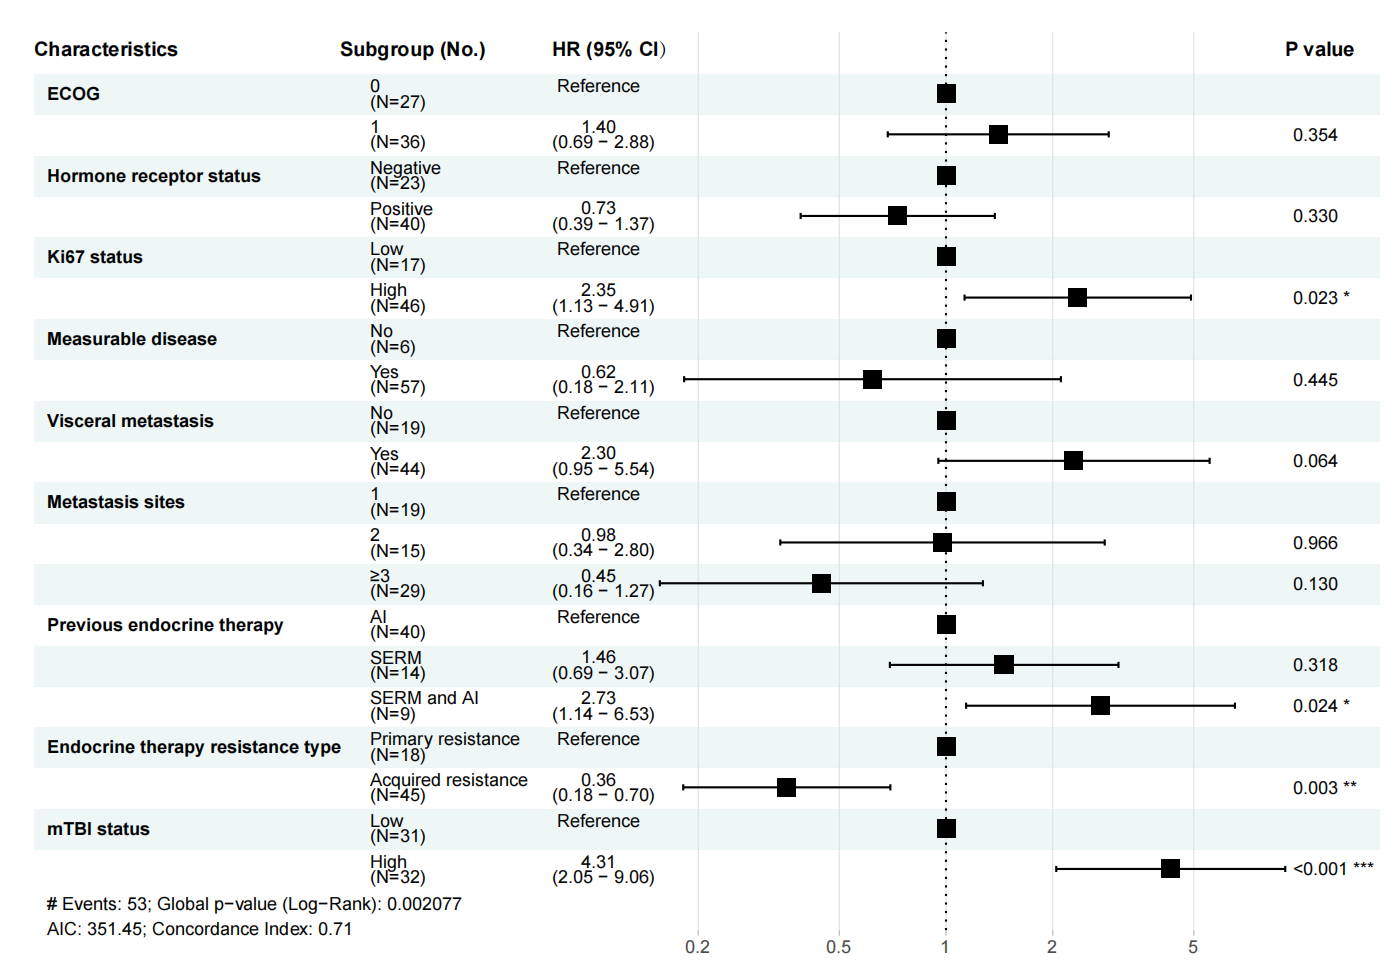


Abbreviations: N/No., number; HR, hazard ratio; CI, confidential interval; ECOG, Eastern Cooperative Oncology Group; mTBI, molecular tumor burden index; AI, aromatase inhibitor; SERM, selective estrogen receptor modulator.

**Supplementary Figure 6.** **Kaplan-Meier plots** **by PI3K pathwaystatus in bireociclib and placebo group.**

(A) PFS by PI3K pathway status in bireociclib group. (B) PFS by PI3K pathway status in placebo group. (C) OS by PI3K pathway status in bireociclib group. (D) OS by PI3K pathway status in placebo group.


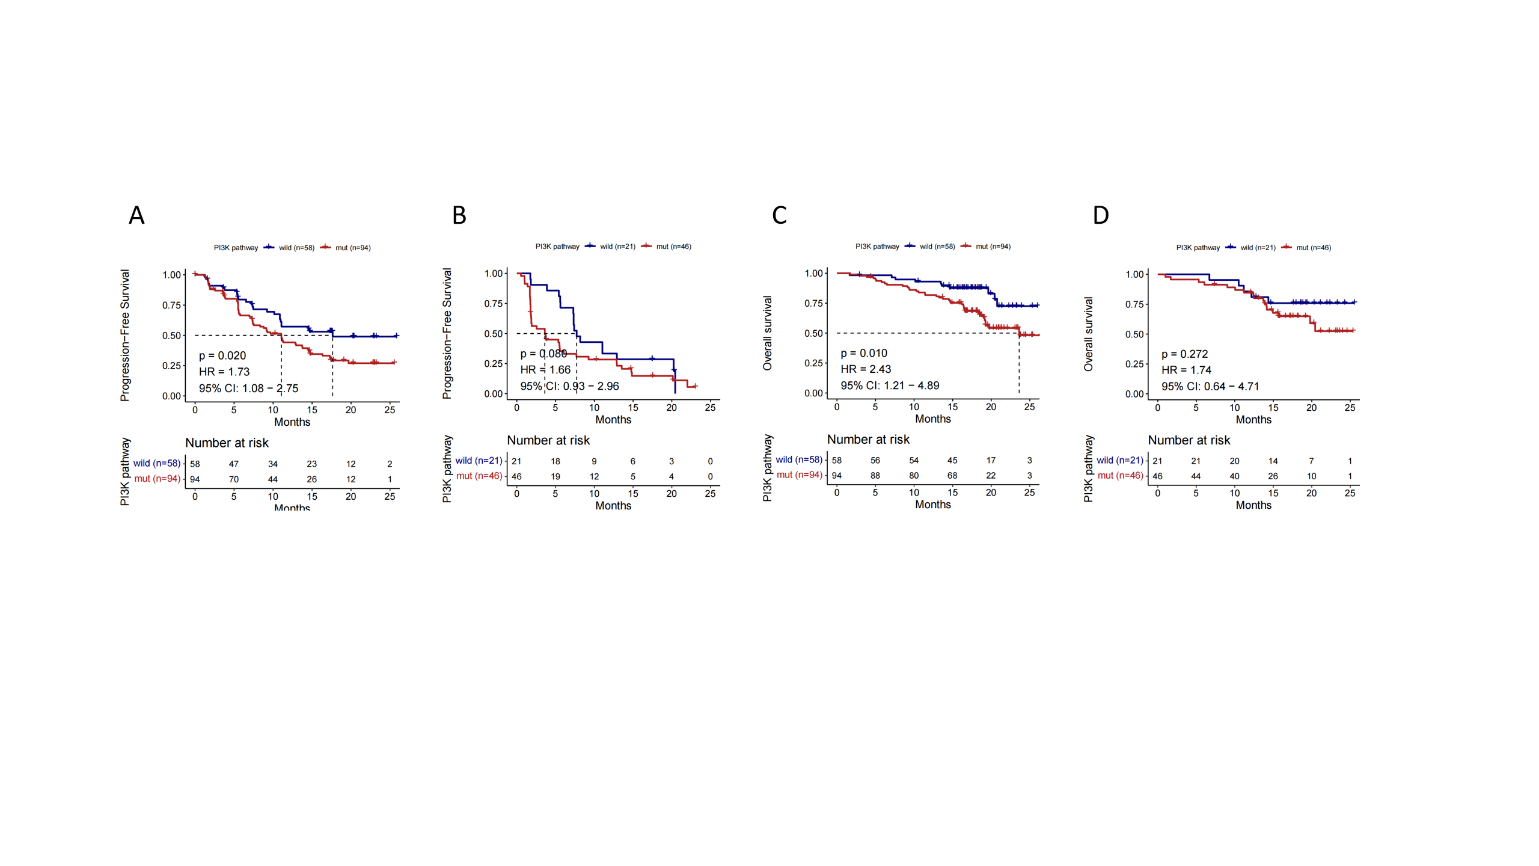


Abbreviations: n, number; HR, hazard ratio; CI, confidential interval.

Remarks: The PI3K pathway includes the following genes: *EIF4EBP1, AKT1, AKT2, AKT3, AKT1S1, DEPDC5, DEPTOR, INPP4B, MAPKAP1, MLST8, MTOR, NPRL2, NPRL3, PDK1, PIK3CA, PIK3CB, PIK3R1, PIK3R2, PIK3R3, PPP2R1A, PTEN, RHEB, RICTOR, RPTOR, RPS6, RPS6KB1, STK11, TSC1, TSC2.*

**Supplementary Figure 7.** **Kaplan-Meier plots by MYC pathwaystatus in bireociclib and placebo group.**

(A) PFS by MYC pathway status in bireociclib group. (B) PFS by MYC pathway status in placebo group. (C) OS by MYC pathway status in bireociclib group. (D) OS by MYC pathway status in placebo group.


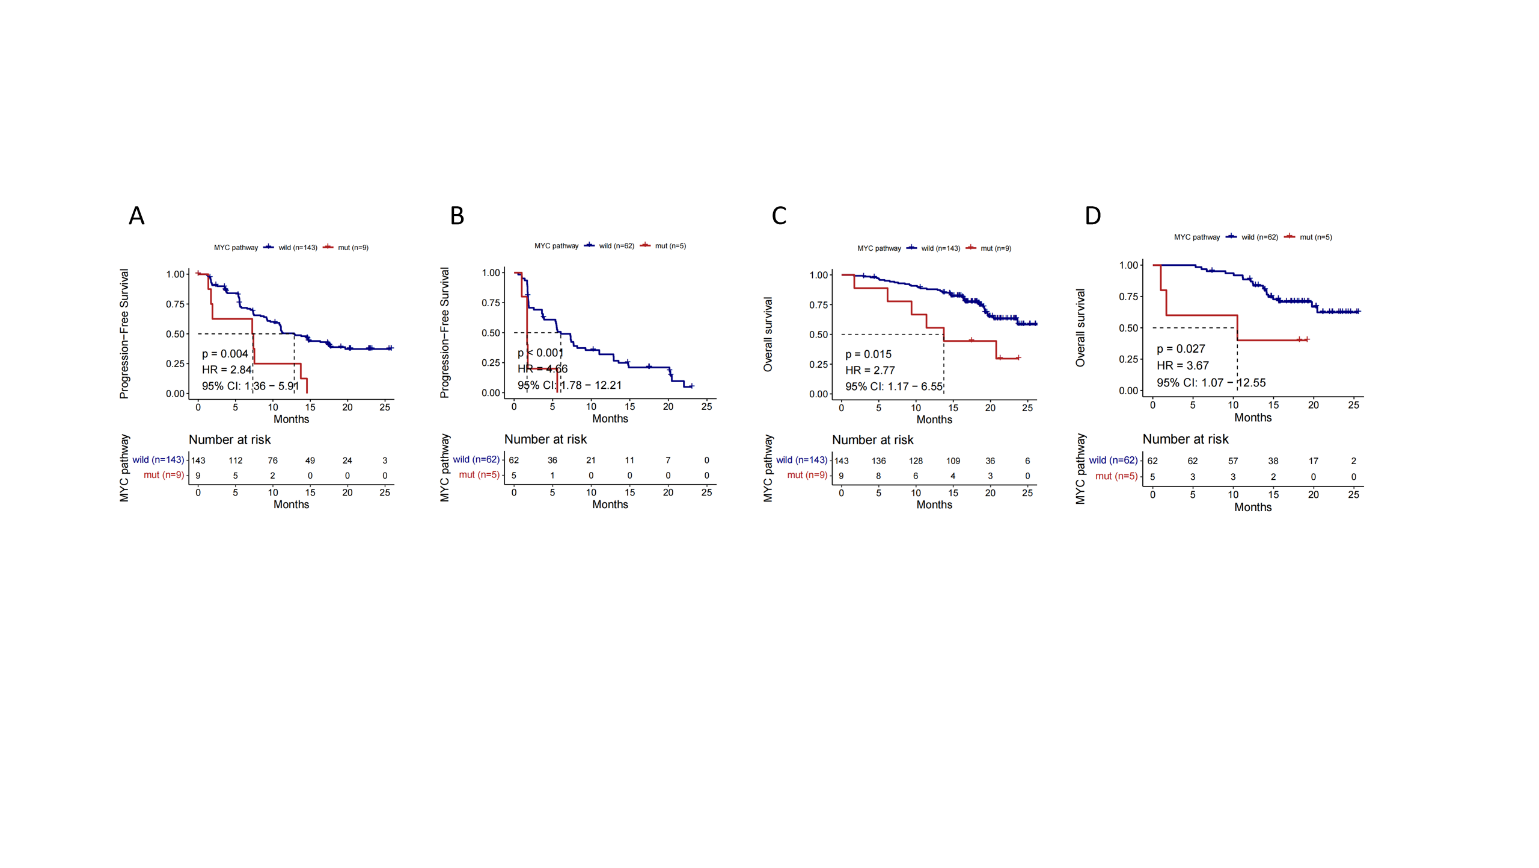


Abbreviations: n, number; HR, hazard ratio; CI, confidential interval.

Remarks: The MYC pathway includes the following genes: *MAX, MGA, MLX, MLXIP, MLXIPL, MNT, MXD1, MXD3, MXD4, MXI1, MYC, MYCL1, MYCN*.

**Supplementary Figure 8.** **Kaplan-Meier** **plots by *gBRCA*-included HRRm status in bireociclib and placebo group.**

(A) PFS by *gBRCA*-included HRRm status in bireociclib group. (B) PFS by *gBRCA*-included HRRm status in placebo group. (C) OS by *gBRCA*-included HRRm status in bireociclib group. (D) OS by *gBRCA*-included HRRm status in placebo group.

**
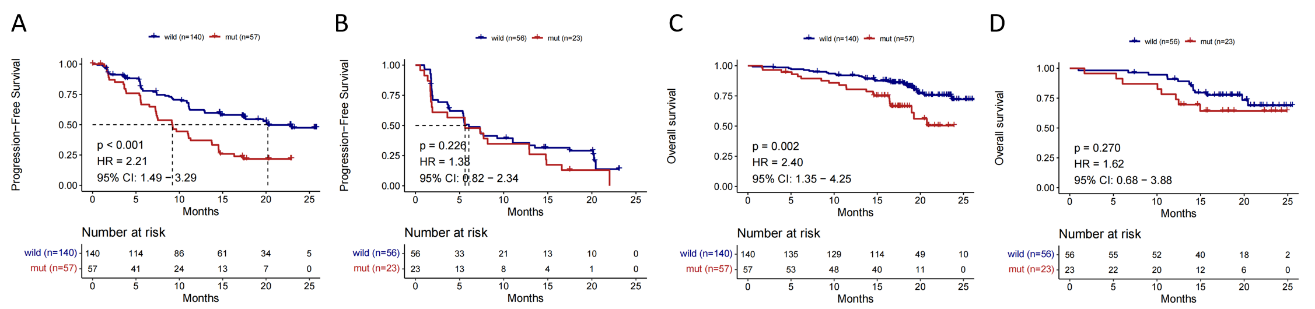
**

Abbreviations: *gBRCA*, germline BRCA; HRR, homologous recombination repair gene; n, number; HR, hazard ratio; CI, confidential interval.

Remarks: HRR includes *ATM*, *ATR*, *BAP1*, *BARD1*, *BLM*, *BRCA1*, *BRCA2*, *BRIP1*, *CHEK1*, *CHEK2*, *CDK12*, *F**ANCA*, *FANCC*, *FANCD2*, *FANCF*, *FANCM*, *MRE11A*, *NBN*, *PALB2*, *RAD50*, *RAD51C*, *RAD51D*, *WRN* and *XRCC2*.

**Supplementary Figure 9.** **Kaplan-Meier plots by *gBRCA* or non-gBRCA-included HRRm status in bireociclib and placebo group.**

(A) PFS by *gBRCA* status in bireociclib group. (B) PFS by *gBRCA* status in placebo group. (C) OS by *gBRCA* status in bireociclib group. (D) OS by *gBRCA* status in placebo group. (E) PFS by HRR status in bireociclib group. (F) PFS by HRR status in placebo group. (G) OS by HRR status in bireociclib group. (H) OS by HRR status in placebo group.


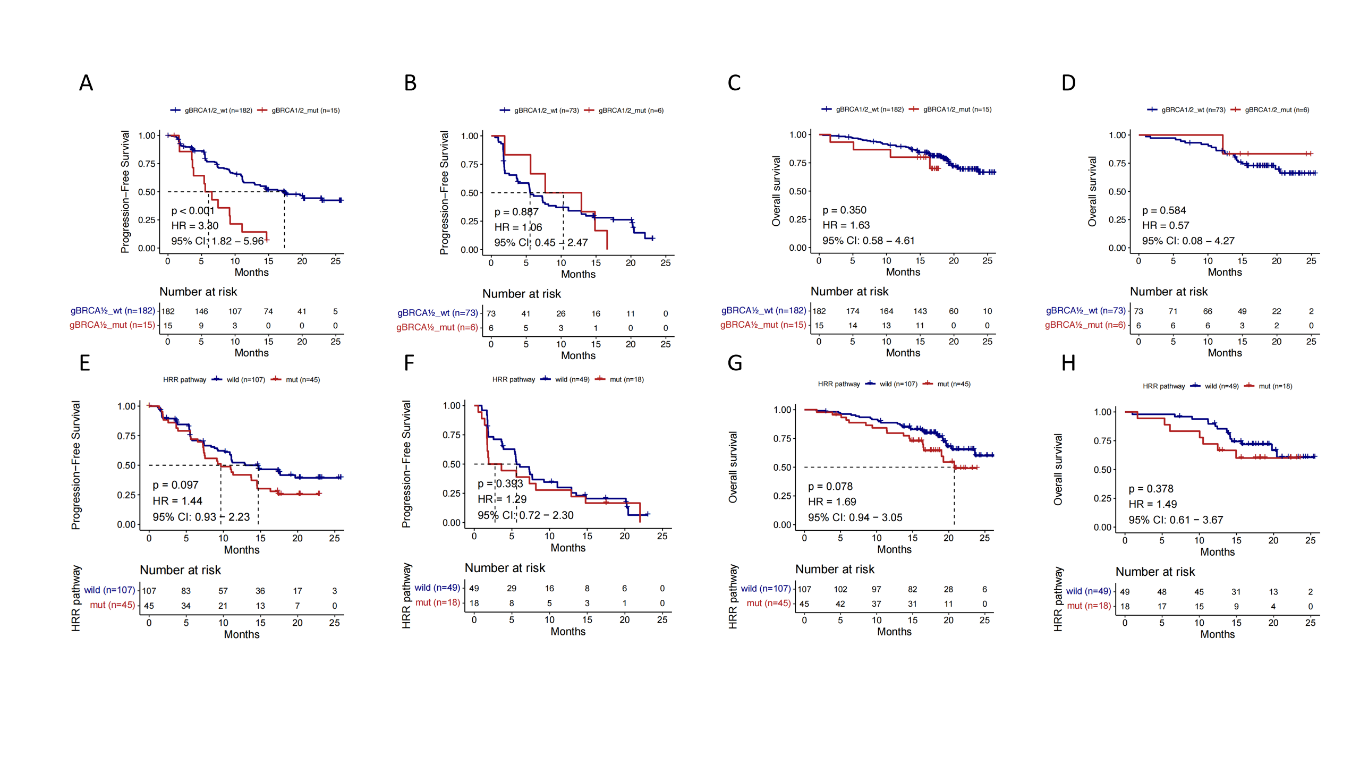


Abbreviations: gBRCA, germline BRCA; HRR, homologous recombination repair gene; n, number; HR, hazard ratio; CI, confidential interval.

Remarks: HRR includes *ATM*, *ATR*, *BAP1*, *BARD1*, *BLM*, *BRCA1*, *BRCA2*, *BRIP1*, *CHEK1*, *CHEK2*, *CDK12*, *FANCA*, *FANCC*, *FANCD2*, *FANCF*, *FANCM*, *MRE11A*, *NBN*, *PALB2*, *RAD50*, *RAD51C*, *RAD51D*, *WRN* and *XRCC2*.

**Supplementary Figure 10. Interaction analysis between *PIK3CA/ESR1* co-mutation status and treatment for PFS.**


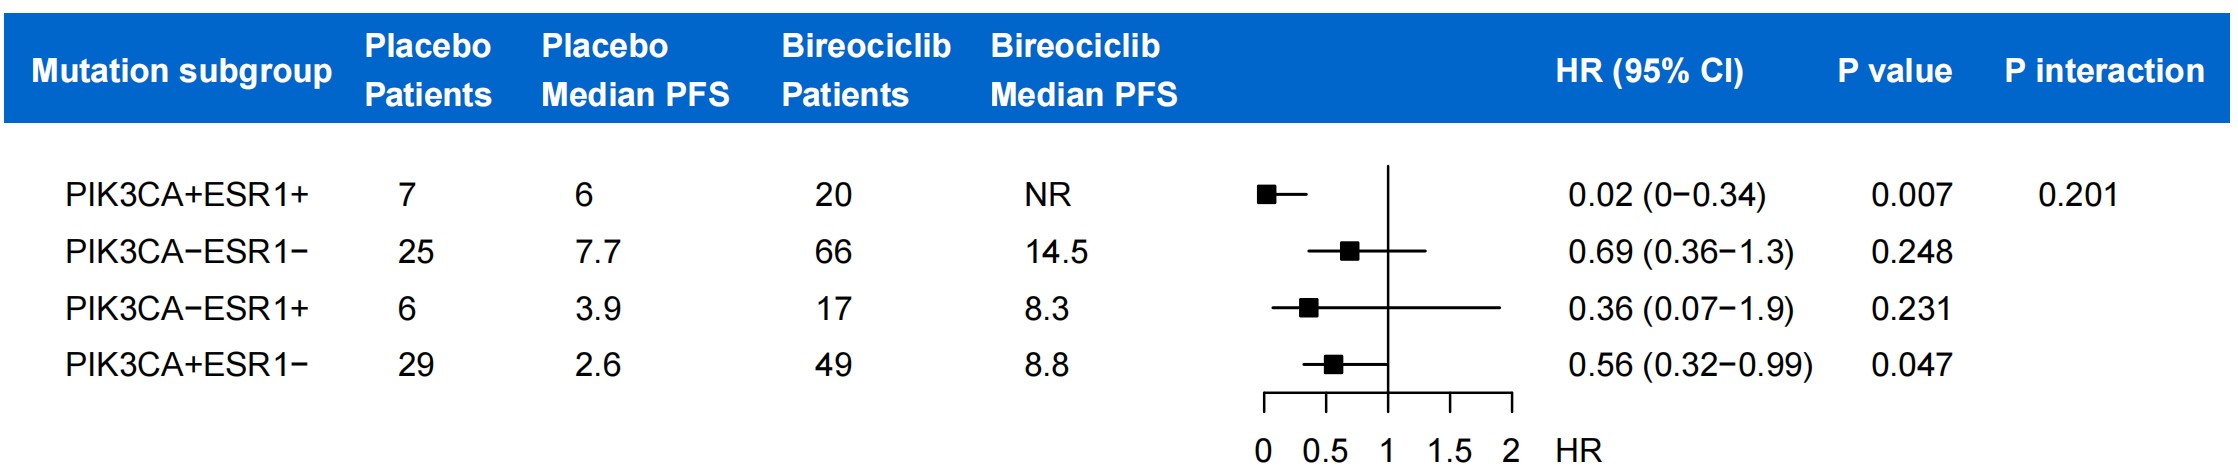


Abbreviations: PFS, progression-free survival; HR, hazard ratio; CI, confidential interval.

Remarks: The interaction analysis was adjusted for clinicopathological features, including ECOG score, HR status, Ki67 expression level, measurable disease, visceral metastases, number of metastatic sites, prior endocrine therapy, and type of endocrine resistance.

**Supplementary Figure 11. Interaction analysis between *ESR1* mutation status and treatment in all *PIK3CA*-mutation patients for PFS.**


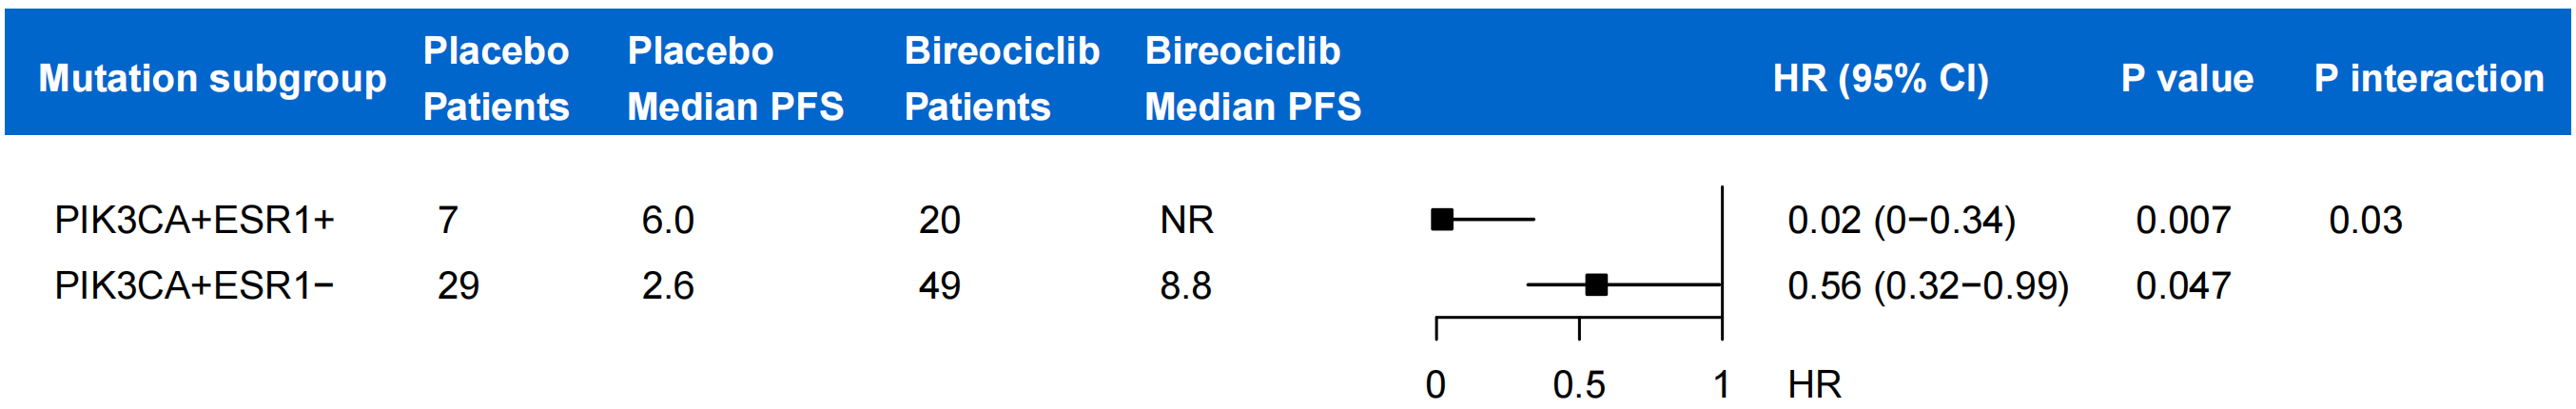


Abbreviations: PFS, progression-free survival; HR, hazard ratio; CI, confidential interval.

Remarks: The interaction analysis was adjusted for clinicopathological features, including ECOG score, HR status, Ki67 expression level, measurable disease, visceral metastases, number of metastatic sites, prior endocrine therapy, and type of endocrine resistance.

**Supplementary Figure 12. Kaplan-Meier plots of dynamic ctDNA status for survival outcomes in placebo group.**

(A) PFS of different C1D1-C5D1 ctDNA status subgroups. (B) OS of different C1D1-C5D1 ctDNA status subgroups.


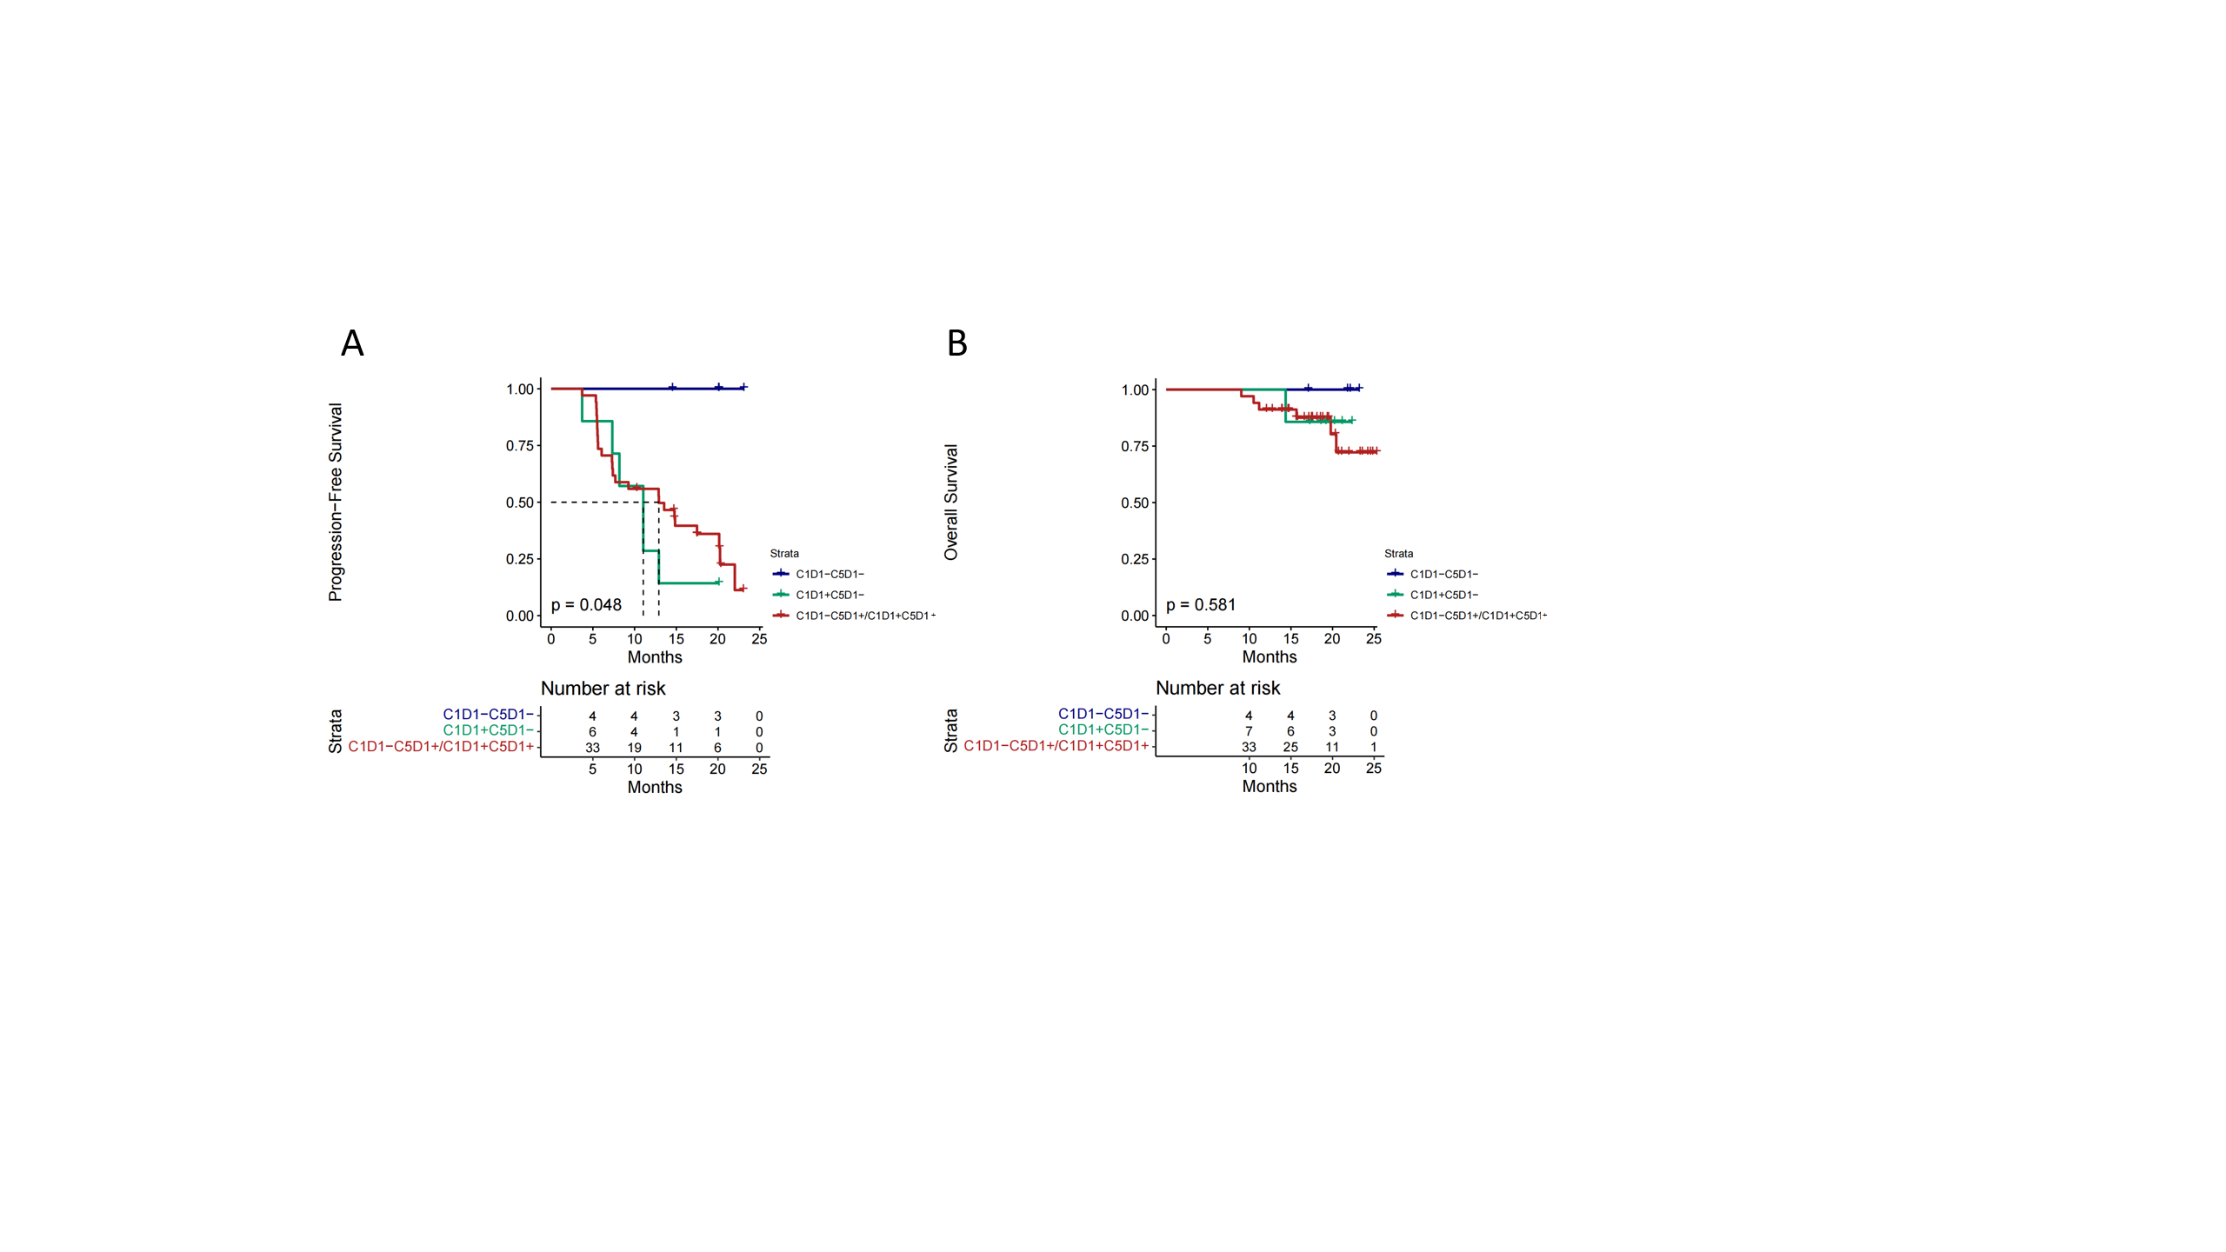


Abbreviations: PFS, progression-free survival; OS, overall survival; C1D1, day 1 of cycle 1; C5D1, day 1 of cycle 5.

**Supplementary Figure 13. Kaplan-Meier plots of PFS in patients treated with bireociclib versus placebo, categorized by dynamic changes in ctDNA status.**


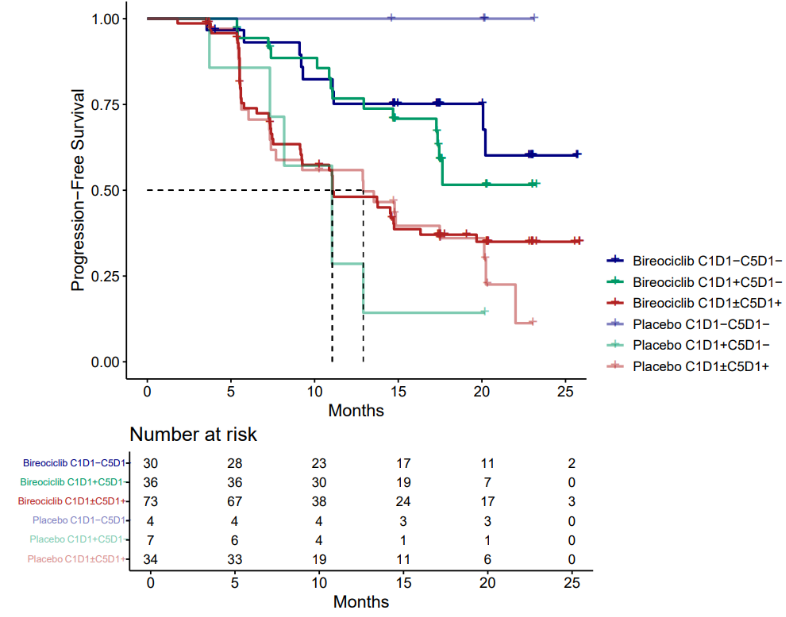


**Supplementary Figure 14. Kaplan-Meier plots of dynamic mTBI change for survival outcomes in placebo group.**

(A) PFS of dynamic mTBI subgroups. (B) OS of dynamic mTBI subgroups.

**
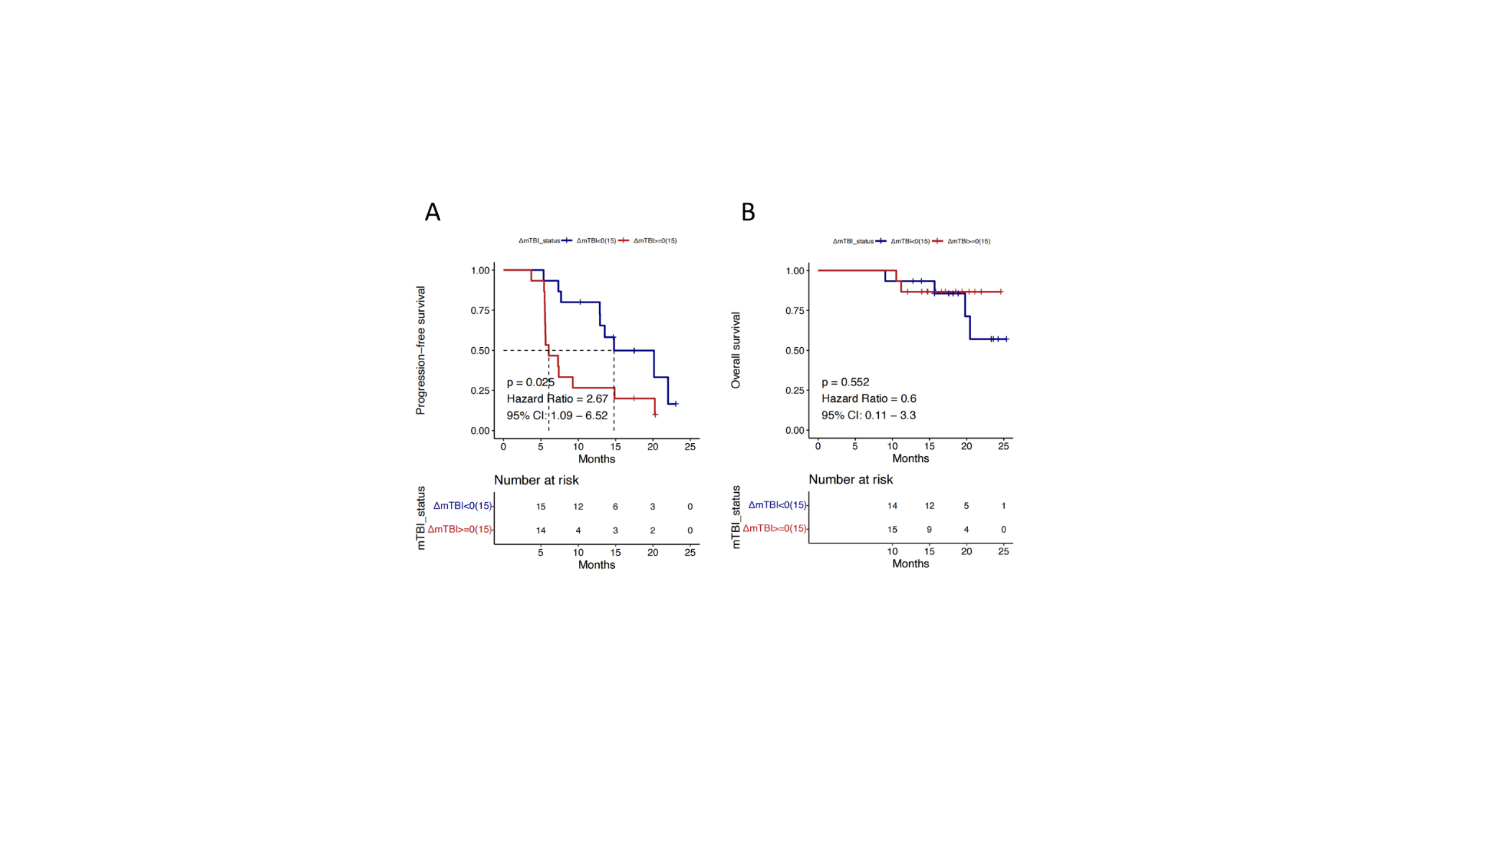
**

Abbreviations: PFS, progression-free survival; OS, overall survival; mTBI, molecular tumor burden index; ΔTBI, the disparity between on-treatment and baseline TBI value; HR, hazard ratio; CI, confidential interval.

**Supplementary Figure 15. Associations between dynamic *PIK3CA* and *ESR1* status with survival outcomes in placebo group.**

(A) Kaplan-Meier curves for PFS of dynamic *PIK3CA* status subgroups. (B) Kaplan-Meier curves for PFS of dynamic *ESR1* status subgroups. (C) Kaplan-Meier plots for OS of dynamic *PIK3CA* status subgroups. (D) Kaplan-Meier plots for OS of dynamic *ESR1* status subgroups.

**
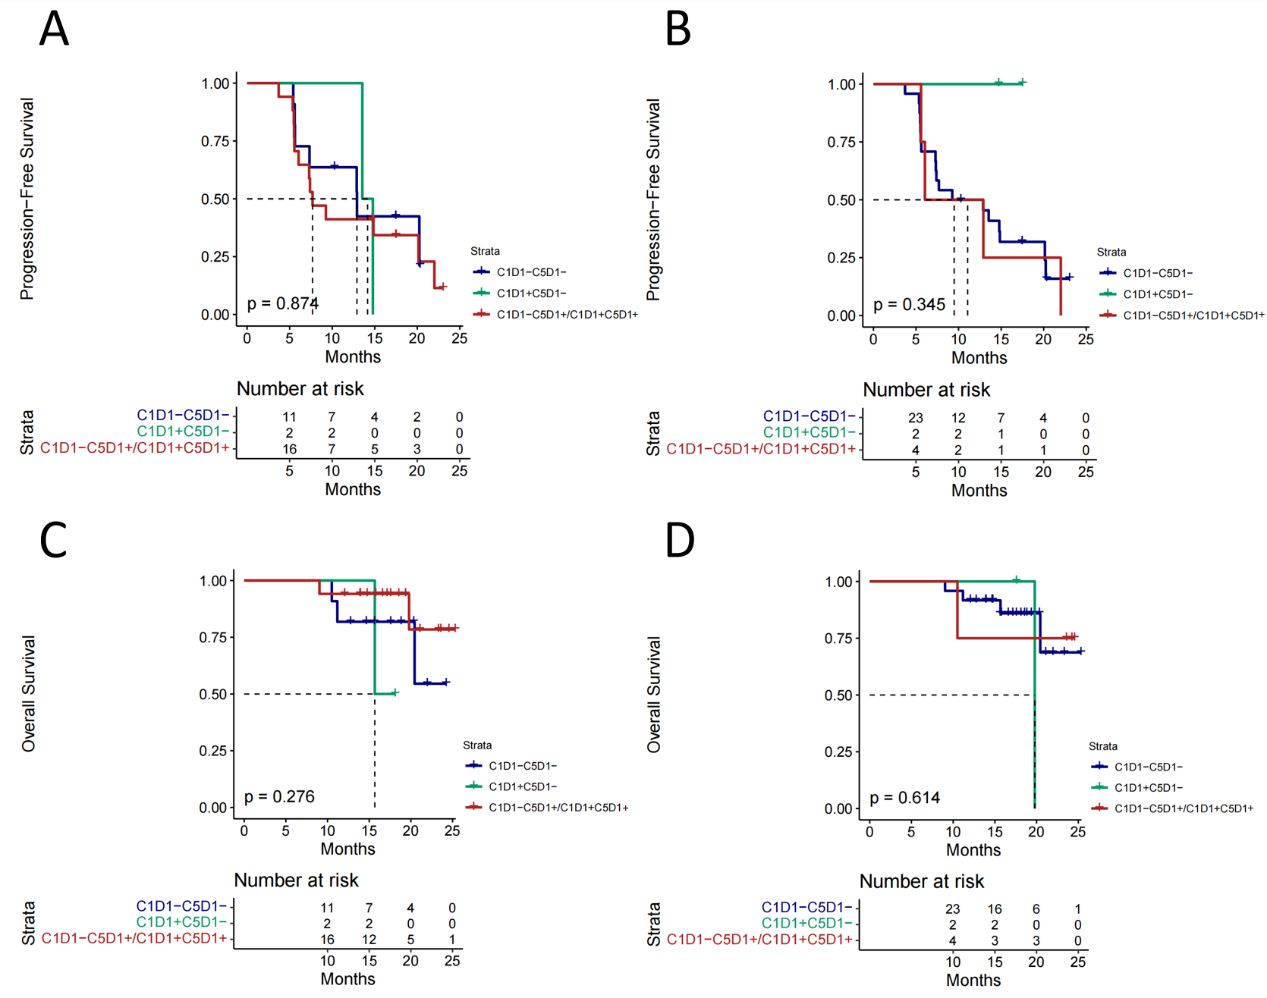
**

Abbreviations: C1D1, day 1 of cycle 1; C5D1, day 1 of cycle 5.

**Supplementary Figure 16. The mutation frequency of each gene across three time points in placebo group.**


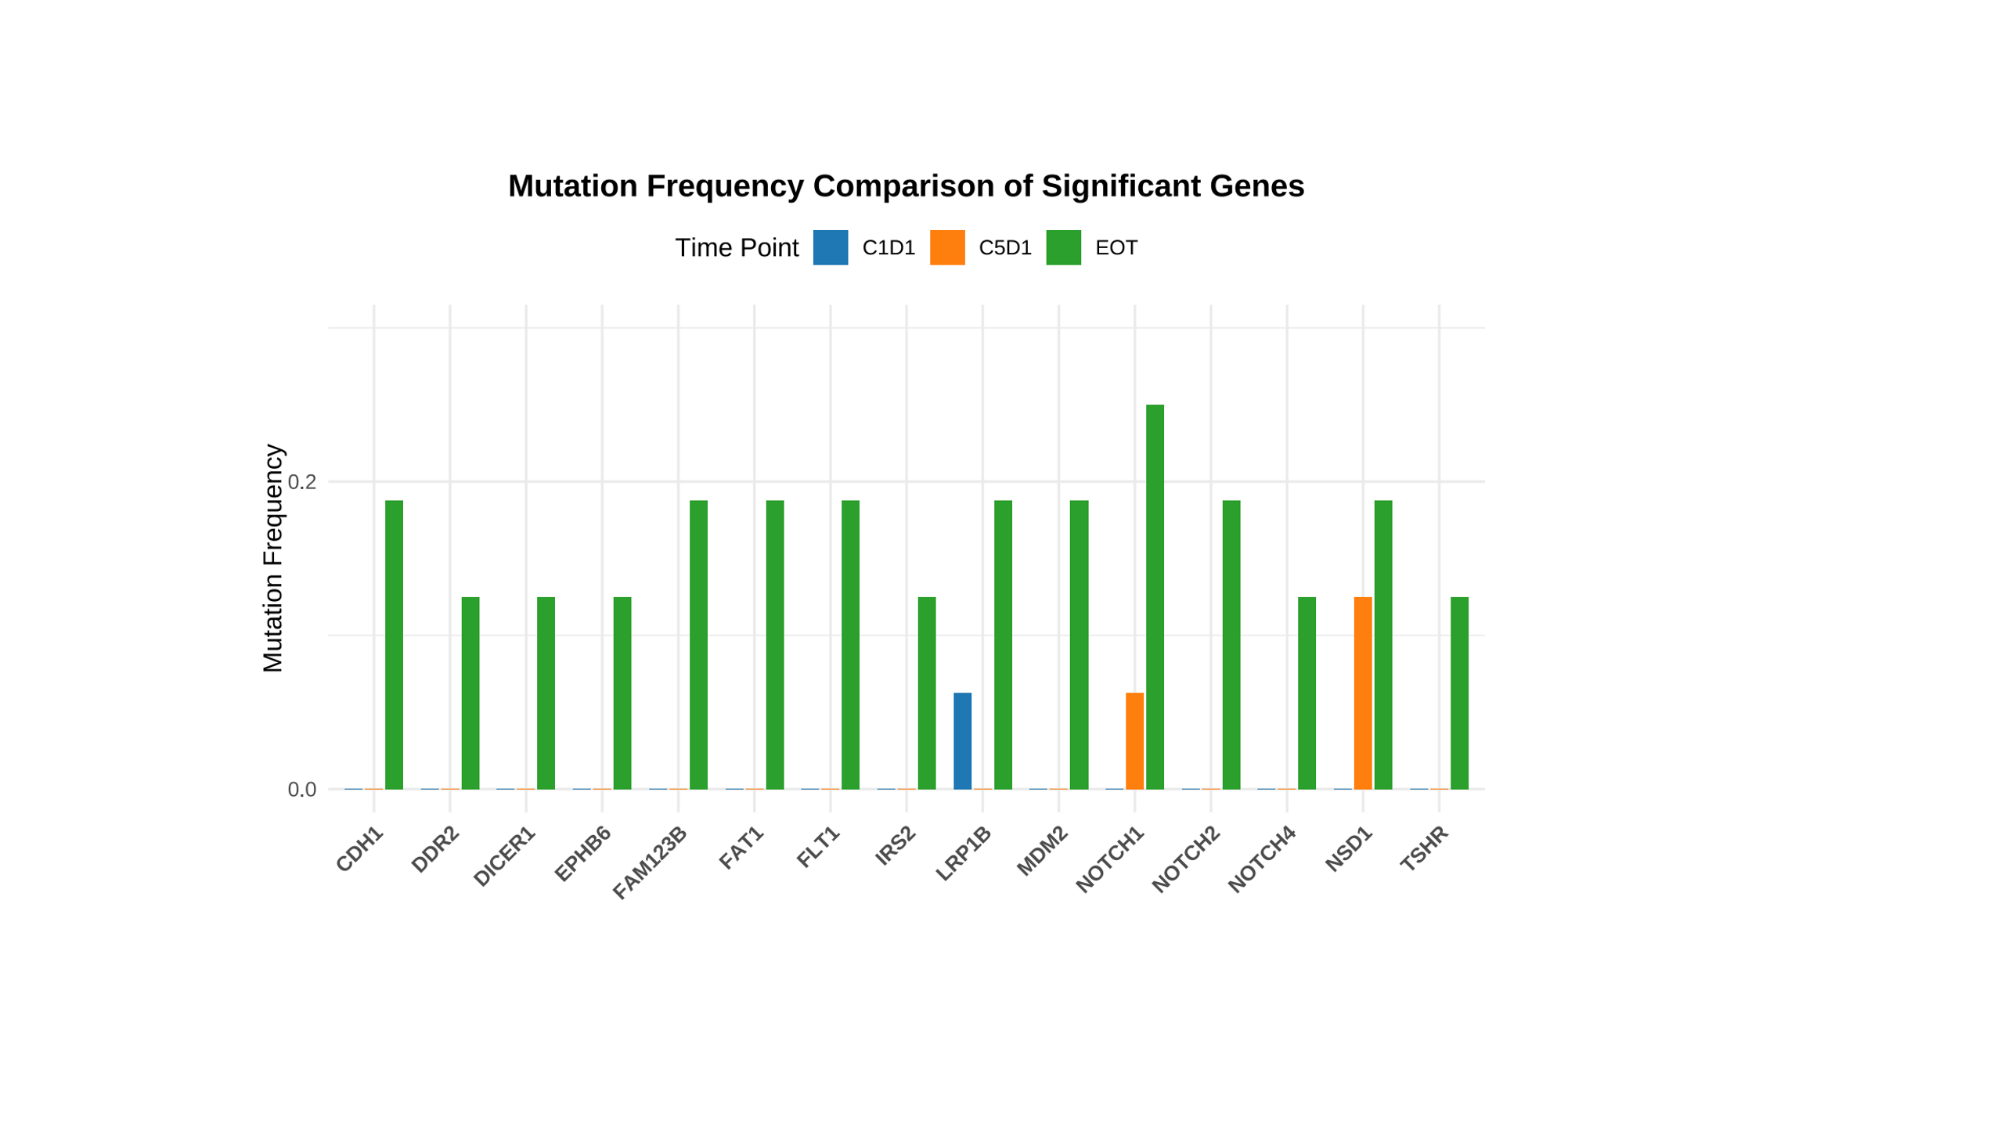


Abbreviations: C1D1, day 1 of cycle 1; C5D1, day 1 of cycle 5; EOT, end of treatment.

**Supplementary Figure 17.** **Gene heatmap of longitudinal paired (C1D1, C5D1, EOT) samples in bireociclib group.**


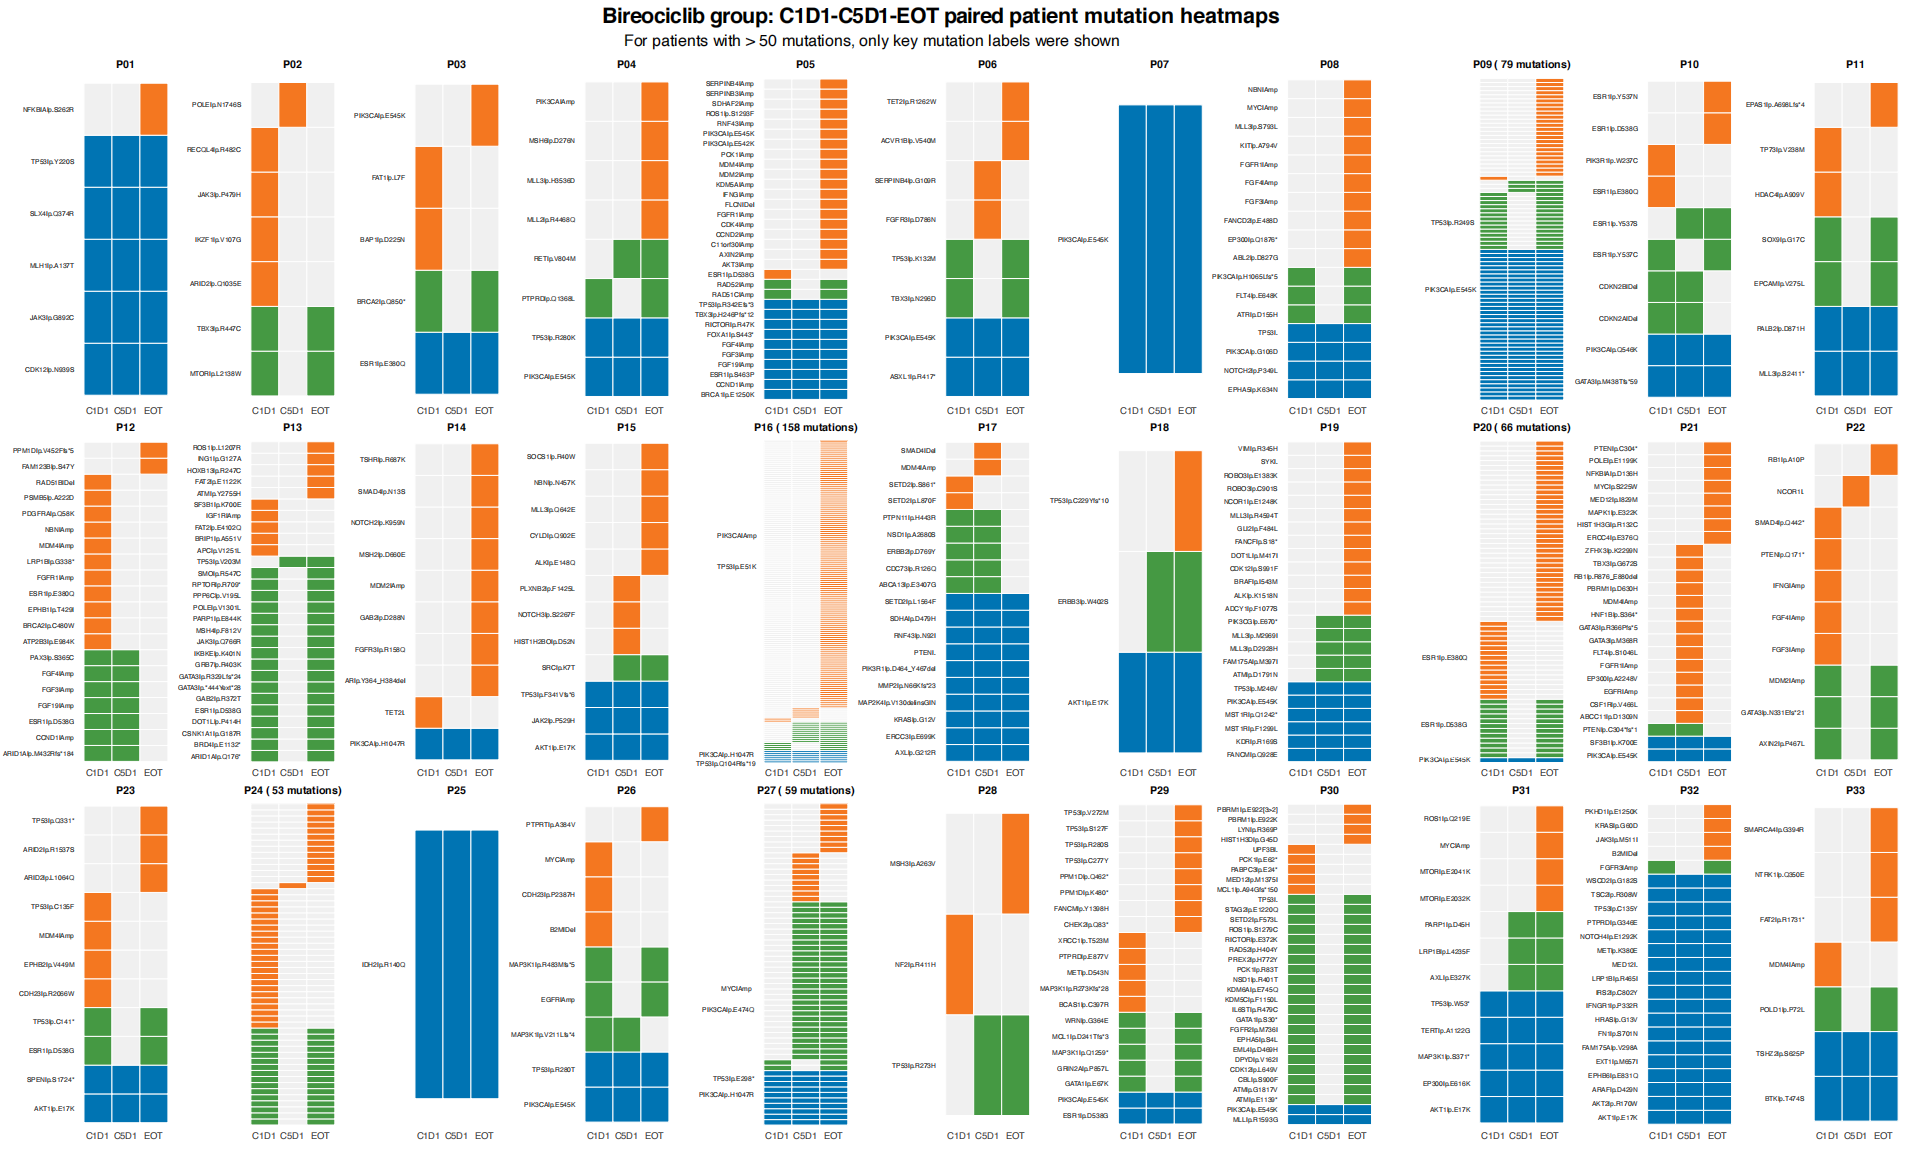


Abbreviations: C1D1, day 1 of cycle 1; C5D1, day 1 of cycle 5; EOT, end of treatment; P, patient.

Remarks: Blue, green, and orange boxes indicate gene loci with mutations detected in all three, any two, or only one timepoint, respectively.

**Supplementary Figure 18.** **Gene heatmap of longitudinal paired (C1D1, C5D1, EOT) samples in palcebo group.**


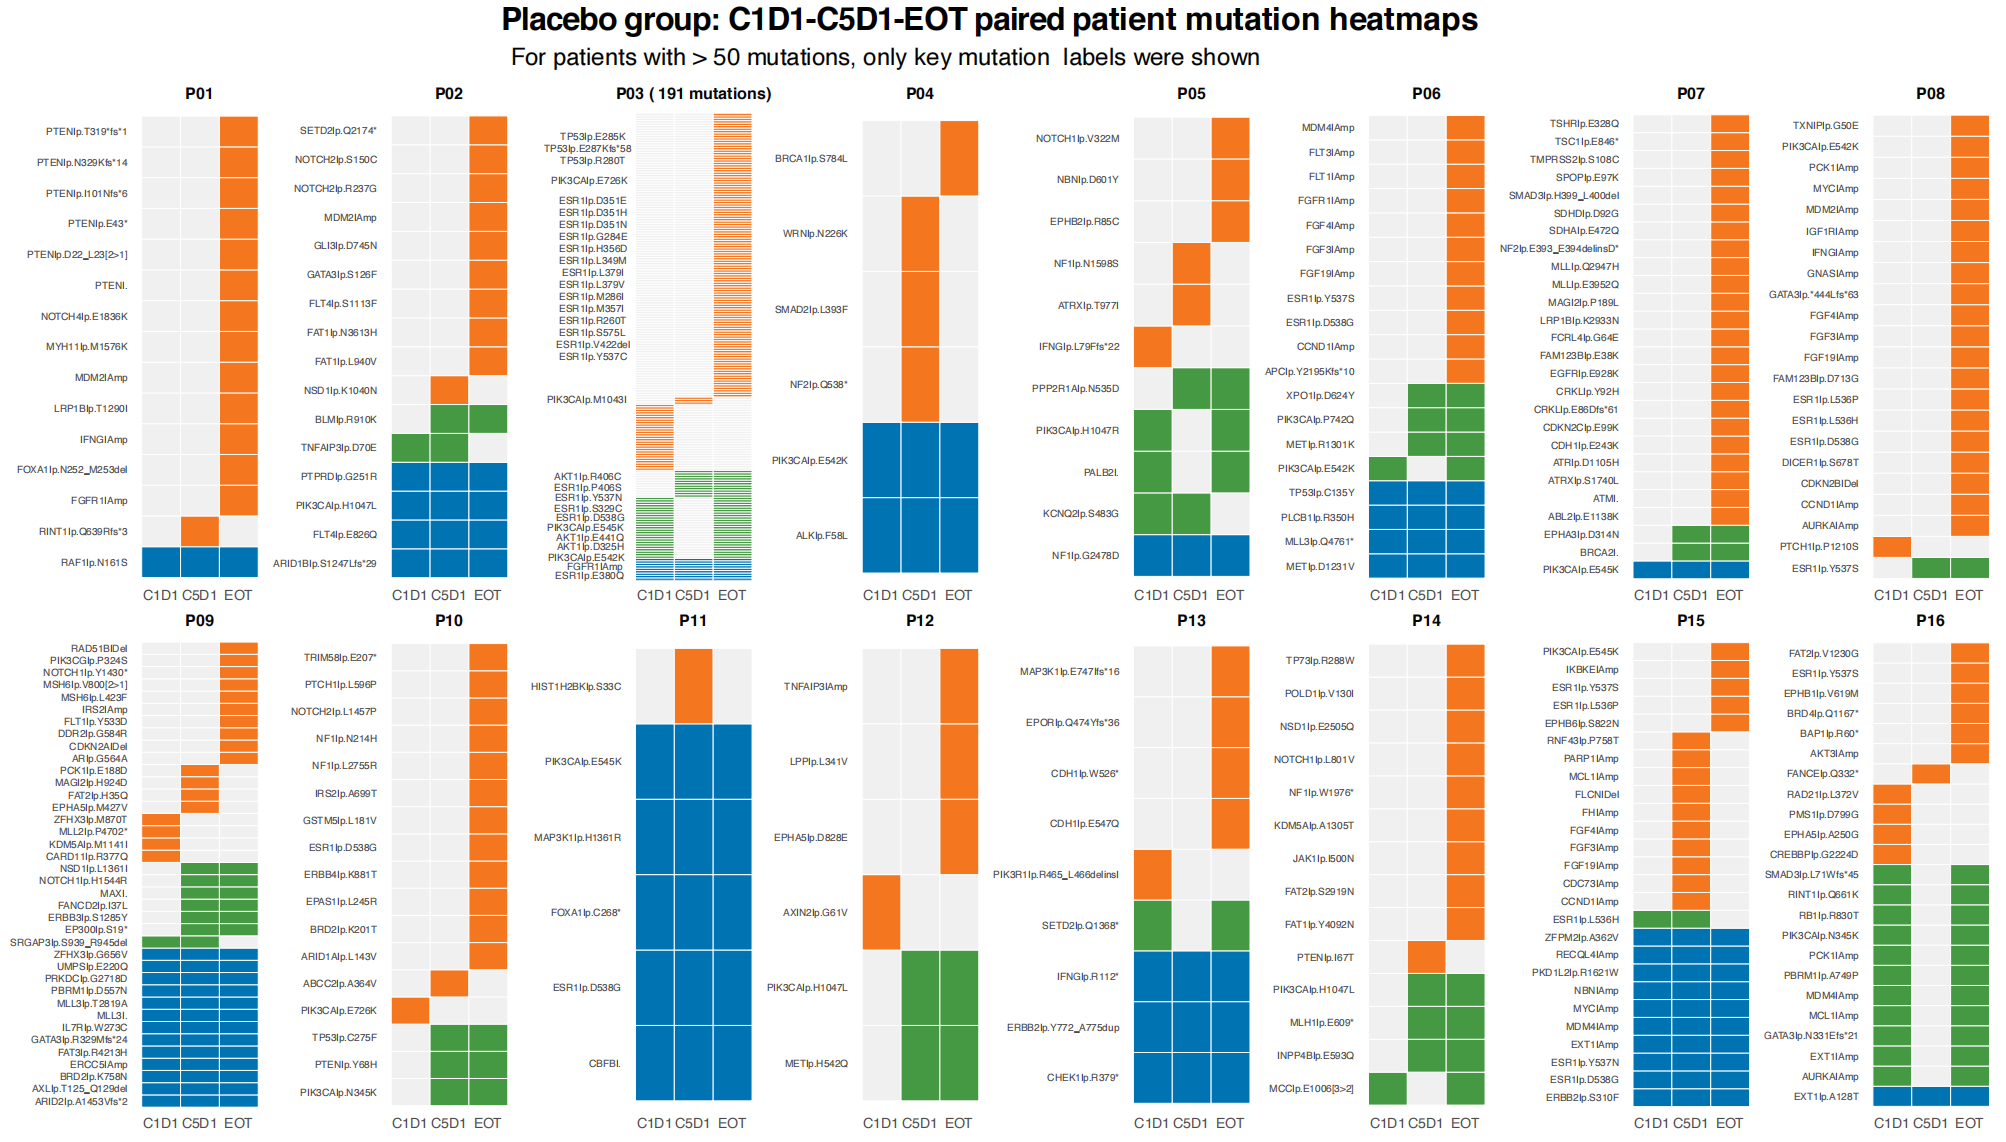


Abbreviations: C1D1, day 1 of cycle 1; C5D1, day 1 of cycle 5; EOT, end of treatment; P, patient.

Remarks: Blue, green, and orange boxes indicate gene loci with mutations detected in all three, any two, or only one timepoint, respectively.

**Supplementary Table 1. 1021 Gene list and the targeted regions.**

| **Gene** | **Coverage** | **Gene** | **Coverage** | **Gene** | **Coverage** |
| --- | --- | --- | --- | --- | --- |
| ABCA13 | selected CDSs | FCRL4 | selected CDSs | PASK | selected CDSs |
| ABCB1 | selected CDSs | FGF10 | selected CDSs | PAX3 | selected CDSs |
| ABCC1 | selected CDSs | FGF12 | selected CDSs | PAX5 | Whole CDS |
| ABCC11 | selected CDSs | FGF14 | selected CDSs | PAX7 | selected CDSs |
| ABCC2 | selected CDSs | FGF19 | Whole CDS | PBRM1 | Whole CDS |
| ABCG2 | selected CDSs | FGF23 | selected CDSs | PC | selected CDSs |
| ABL1 | Whole CDS | FGF3 | Whole CDS | PCDH18 | selected CDSs |
| ABL2 | selected CDSs | FGF4 | Whole CDS | PCK1 | Whole CDS |
| ACACA | selected CDSs | FGF6 | selected CDSs | PCSK6 | selected CDSs |
| ACIN1 | selected CDSs | FGFR1 | Whole CDS,no-coding region, SNP for CNV | PCSK7 | selected CDSs |
| ACTB | selected CDSs | FGFR2 | Whole CDS,no-coding region | PDCD1 | Whole CDS |
| ACTG1 | selected CDSs | FGFR3 | Whole CDS,no-coding region, SNP for CNV | PDCD11 | selected CDSs |
| ACTG2 | selected CDSs | FGFR4 | Whole CDS | PDCD1LG2 | Whole CDS |
| ACVR1B | Whole CDS | FH | Whole CDS | PDE4DIP | selected CDSs |
| ACVR2A | selected CDSs | FLCN | Whole CDS | PDGFB | selected CDSs |
| ACVRL1 | selected CDSs | FLG | selected CDSs | PDGFRA | Whole CDS,no-coding region, SNP for CNV |
| ADAM29 | selected CDSs | FLI1 | selected CDSs | PDGFRB | Whole CDS |
| ADAMTS5 | selected CDSs | FLNC | selected CDSs | PDILT | selected CDSs |
| ADCY1 | selected CDSs | FLT1 | Whole CDS | PDK1 | Whole CDS |
| AFF1 | selected CDSs | FLT3 | Whole CDS | PER1 | selected CDSs |
| AFF2 | selected CDSs | FLT4 | Whole CDS | PGR | selected CDSs |
| AFF3 | selected CDSs | FMN2 | selected CDSs | PHF1 | selected CDSs |
| AHNAK | selected CDSs | FN1 | selected CDSs | PHF6 | selected CDSs |
| AKAP9 | selected CDSs | FNDC4 | selected CDSs | PIK3C2A | selected CDSs |
| AKT1 | Whole CDS | FOXA1 | Whole CDS | PIK3C2B | selected CDSs |
| AKT2 | Whole CDS | FOXA2 | selected CDSs | PIK3C2G | selected CDSs |
| AKT3 | Whole CDS | FOXL2 | Whole CDS | PIK3C3 | selected CDSs |
| ALB | selected CDSs | FOXO1 | selected CDSs | PIK3CA | Whole CDS |
| ALK | Whole CDS,no-coding region, SNP for CNV | FOXO3 | selected CDSs | PIK3CB | Whole CDS |
| AMOT | selected CDSs | FOXP1 | Whole CDS | PIK3CG | Whole CDS |
| ANGPT1 | selected CDSs | FOXQ1 | selected CDSs | PIK3R1 | Whole CDS |
| ANK3 | selected CDSs | FRMPD4 | selected CDSs | PIK3R2 | Whole CDS |
| ANKRD11 | selected CDSs | FUBP1 | Whole CDS | PIM1 | selected CDSs |
| ANKRD30A | selected CDSs | FUS | selected CDSs | PKD1L2 | selected CDSs |
| ANKRD30B | selected CDSs | FXR1 | selected CDSs | PKHD1 | selected CDSs |
| APC | Whole CDS | FYN | selected CDSs | PLAG1 | selected CDSs |
| APEX1 | selected CDSs | FZD1 | selected CDSs | PLCB1 | selected CDSs |
| APOBEC3B | selected CDSs | G3BP1 | selected CDSs | PLCG1 | selected CDSs |
| AR | Whole CDS | G3BP2 | selected CDSs | PLCG2 | selected CDSs |
| ARAF | Whole CDS | GAB2 | selected CDSs | PLK1 | selected CDSs |
| ARAP3 | selected CDSs | GABRA6 | selected CDSs | PLXNA1 | selected CDSs |
| ARFGEF1 | selected CDSs | GALNT12 | Whole CDS | PLXNB2 | selected CDSs |
| ARFGEF2 | selected CDSs | GATA1 | selected CDSs | PMS1 | Whole CDS |
| ARHGAP29 | selected CDSs | GATA2 | selected CDSs | PMS2 | Whole CDS,no-coding region |
| ARHGAP35 | selected CDSs | GATA3 | Whole CDS | PNRC1 | selected CDSs |
| ARID1A | Whole CDS | GFRAL | selected CDSs | POLD1 | Whole CDS |
| ARID1B | Whole CDS | GIGYF1 | selected CDSs | POLE | Whole CDS |
| ARID2 | Whole CDS | GKN2 | selected CDSs | POLQ | selected CDSs |
| ARID4B | selected CDSs | GLB1L3 | selected CDSs | POM121 | selected CDSs |
| ARID5B | selected CDSs | GLI1 | selected CDSs | POM121L12 | selected CDSs |
| ARNT | selected CDSs | GLI2 | selected CDSs | POT1 | Whole CDS |
| ASCL4 | selected CDSs | GLI3 | selected CDSs | POU2AF1 | selected CDSs |
| ASH1L | selected CDSs | GMPS | selected CDSs | PPM1D | selected CDSs |
| ASMTL | selected CDSs | GNA11 | Whole CDS | PPP1R17 | selected CDSs |
| ASPM | selected CDSs | GNA13 | selected CDSs | PPP2R1A | Whole CDS |
| ASTN1 | selected CDSs | GNAQ | Whole CDS | PPP6C | selected CDSs |
| ASXL1 | Whole CDS | GNAS | Whole CDS | PRDM1 | Whole CDS |
| ASXL2 | selected CDSs | GNG2 | selected CDSs | PRDM16 | selected CDSs |
| ATIC | selected CDSs | GPC3 | selected CDSs | PREX2 | selected CDSs |
| ATM | Whole CDS | GPR124 | selected CDSs | PRF1 | selected CDSs |
| ATP11B | selected CDSs | GPS2 | selected CDSs | PRKAA1 | selected CDSs |
| ATP12A | selected CDSs | GPX1 | selected CDSs | PRKAR1A | Whole CDS |
| ATP1A1 | selected CDSs | GRB7 | selected CDSs | PRKCB | selected CDSs |
| ATP2B3 | selected CDSs | GRIN2A | Whole CDS | PRKCI | selected CDSs |
| ATR | Whole CDS | GRM3 | Whole CDS | PRKDC | selected CDSs |
| ATRX | Whole CDS | GSK3B | selected CDSs | PRRX1 | selected CDSs |
| AURKA | Whole CDS | GSTM5 | selected CDSs | PRX | selected CDSs |
| AURKB | Whole CDS | GSTP1 | selected CDSs | PSG2 | selected CDSs |
| AXIN1 | Whole CDS | GUSB | selected CDSs | PSIP1 | selected CDSs |
| AXIN2 | Whole CDS | H3F3A | selected CDSs | PSMB1 | selected CDSs |
| AXL | Whole CDS | H3F3B | selected CDSs | PSMB5 | selected CDSs |
| B2M | Whole CDS | H3F3C | selected CDSs | PTCH1 | Whole CDS |
| BAP1 | Whole CDS | HCLS1 | selected CDSs | PTCH2 | Whole CDS |
| BARD1 | Whole CDS | HCN1 | selected CDSs | PTEN | Whole CDS |
| BAZ2B | selected CDSs | HDAC1 | Whole CDS | PTGS1 | selected CDSs |
| BBC3 | selected CDSs | HDAC4 | selected CDSs | PTGS2 | selected CDSs |
| BBS9 | selected CDSs | HDAC9 | selected CDSs | PTPN11 | Whole CDS |
| BCAS1 | selected CDSs | HECW1 | selected CDSs | PTPN13 | selected CDSs |
| BCL10 | selected CDSs | HEY1 | selected CDSs | PTPN2 | selected CDSs |
| BCL11A | selected CDSs | HGF | Whole CDS | PTPRB | selected CDSs |
| BCL11B | selected CDSs | HIST1H1C | selected CDSs | PTPRD | Whole CDS |
| BCL2 | Whole CDS | HIST1H1D | selected CDSs | PTPRK | selected CDSs |
| BCL2A1 | selected CDSs | HIST1H1E | selected CDSs | PTPRO | selected CDSs |
| BCL2L1 | Whole CDS | HIST1H2AC | selected CDSs | PTPRS | selected CDSs |
| BCL2L11 | selected CDSs,no-coding region | HIST1H2AG | selected CDSs | PTPRT | selected CDSs |
| BCL3 | selected CDSs | HIST1H2AL | selected CDSs | PTPRU | selected CDSs |
| BCL6 | selected CDSs | HIST1H2AM | selected CDSs | RAB35 | selected CDSs |
| BCL9 | selected CDSs | HIST1H2BC | selected CDSs | RAC1 | Whole CDS |
| BCOR | Whole CDS | HIST1H2BD | selected CDSs | RAC2 | selected CDSs |
| BCORL1 | selected CDSs | HIST1H2BJ | selected CDSs | RAD21 | selected CDSs |
| BCR | selected CDSs | HIST1H2BK | selected CDSs | RAD50 | Whole CDS |
| BIRC3 | selected CDSs | HIST1H2BO | selected CDSs | RAD51 | Whole CDS |
| BLM | Whole CDS | HIST1H3B | selected CDSs | RAD51B | Whole CDS |
| BMPR1A | Whole CDS | HIST1H3C | selected CDSs | RAD51C | Whole CDS |
| BMPR2 | selected CDSs | HIST1H3D | selected CDSs | RAD51D | Whole CDS |
| BNC2 | selected CDSs | HIST1H3F | selected CDSs | RAD52 | Whole CDS |
| BPTF | selected CDSs | HIST1H3G | selected CDSs | RAD54B | selected CDSs |
| BRAF | Whole CDS,no-coding region | HIST1H3H | selected CDSs | RAD54L | Whole CDS |
| BRCA1 | Whole CDS,no-coding region, SNP for CNV | HIST1H3I | selected CDSs | RAF1 | Whole CDS,no-coding region |
| BRCA2 | Whole CDS, SNP for CNV | HIST1H4I | selected CDSs | RANBP2 | selected CDSs |
| BRD2 | selected CDSs | HIST3H3 | selected CDSs | RARA | Whole CDS |
| BRD3 | selected CDSs | HLA-A | selected CDSs | RASA1 | selected CDSs |
| BRD4 | Whole CDS,no-coding region | HLA-B | selected CDSs | RASGRP1 | selected CDSs |
| BRIP1 | Whole CDS | HLA-C | selected CDSs | RB1 | Whole CDS, SNP for CNV |
| BRSK1 | selected CDSs | HLF | selected CDSs | RBL1 | selected CDSs |
| BRWD1 | selected CDSs | HMCN1 | selected CDSs | RBM10 | Whole CDS |
| BTK | Whole CDS | HNF1A | Whole CDS | RECQL | Whole CDS |
| BTLA | selected CDSs | HNF1B | selected CDSs | RECQL4 | Whole CDS |
| BUB1 | selected CDSs | HNRPDL | selected CDSs | REL | selected CDSs |
| C11orf30 | Whole CDS | HOXA11 | selected CDSs | RELN | selected CDSs |
| C15orf23 | selected CDSs | HOXA13 | selected CDSs | RET | Whole CDS,no-coding region |
| C15orf55 | selected CDSs | HOXA3 | selected CDSs | RFC1 | selected CDSs |
| C1QA | selected CDSs | HOXA9 | selected CDSs | RGS3 | selected CDSs |
| C1S | selected CDSs | HOXB13 | Whole CDS | RHEB | selected CDSs |
| C3orf70 | selected CDSs | HOXC13 | selected CDSs | RHOA | Whole CDS |
| C7orf53 | selected CDSs | HOXD11 | selected CDSs | RHOH | selected CDSs |
| C8orf34 | selected CDSs | HOXD13 | selected CDSs | RHOT1 | selected CDSs |
| CACNA1E | selected CDSs | HRAS | Whole CDS | RICTOR | Whole CDS |
| CADM2 | selected CDSs | HSD3B1 | selected CDSs | RINT1 | Whole CDS |
| CALR | selected CDSs | HSP90AA1 | selected CDSs | RIT1 | selected CDSs |
| CAMTA1 | selected CDSs | HSP90AB1 | selected CDSs | RNASEL | selected CDSs |
| CARD11 | Whole CDS | HSPA8 | selected CDSs | RNF43 | Whole CDS |
| CASP1 | selected CDSs | HSPD1 | selected CDSs | ROBO1 | selected CDSs |
| CASP8 | Whole CDS | HSPH1 | selected CDSs | ROBO2 | selected CDSs |
| CASQ2 | selected CDSs | ICK | selected CDSs | ROBO3 | selected CDSs |
| CBFB | Whole CDS | ICOSLG | selected CDSs | ROCK1 | selected CDSs |
| CBL | Whole CDS | ID3 | selected CDSs | ROS1 | Whole CDS,no-coding region |
| CBLB | selected CDSs | IDH1 | Whole CDS | RPGR | selected CDSs |
| CBR1 | selected CDSs | IDH2 | Whole CDS | RPS6KB1 | selected CDSs |
| CBR3 | selected CDSs | IFITM3 | selected CDSs | RPS6KB2 | selected CDSs |
| CCDC168 | selected CDSs | IFNG | Whole CDS | RPTOR | Whole CDS |
| CCNA1 | selected CDSs | IFNGR1 | Whole CDS | RSPO2 | selected CDSs,no-coding region |
| CCNB3 | selected CDSs | IGF1 | selected CDSs | RSPO3 | selected CDSs |
| CCND1 | Whole CDS, SNP for CNV | IGF1R | Whole CDS | RUNX1 | Whole CDS |
| CCND2 | Whole CDS | IGF2 | selected CDSs | RUNX1T1 | selected CDSs |
| CCND3 | Whole CDS | IGF2R | selected CDSs | RUNX2 | selected CDSs |
| CCNE1 | Whole CDS | IGLL5 | selected CDSs | RXRA | selected CDSs |
| CCT3 | selected CDSs | IKBKE | Whole CDS | RYR1 | selected CDSs |
| CCT5 | selected CDSs | IKZF1 | Whole CDS | RYR2 | selected CDSs |
| CCT6B | selected CDSs | IKZF2 | selected CDSs | SBDS | selected CDSs |
| CD22 | selected CDSs | IKZF3 | selected CDSs | SCUBE2 | selected CDSs |
| CD274 | Whole CDS, SNP for CNV | IL10 | selected CDSs | SDC4 | selected CDSs,no-coding region |
| CD33 | selected CDSs | IL1RAPL1 | selected CDSs | SDHA | Whole CDS |
| CD5L | selected CDSs | IL21R | selected CDSs | SDHAF2 | Whole CDS |
| CD74 | selected CDSs,no-coding region | IL6 | selected CDSs | SDHB | Whole CDS |
| CDA | selected CDSs | IL6ST | selected CDSs | SDHC | Whole CDS |
| CDC73 | Whole CDS | IL7R | Whole CDS | SDHD | Whole CDS |
| CDH1 | Whole CDS | IMPG1 | selected CDSs | SEC31A | selected CDSs |
| CDH11 | selected CDSs | ING1 | selected CDSs | SEMA3A | selected CDSs |
| CDH18 | selected CDSs | INHBA | selected CDSs | SEMA3E | selected CDSs |
| CDH23 | selected CDSs | INPP4A | selected CDSs | SEMA6A | selected CDSs |
| CDK12 | Whole CDS | INPP4B | Whole CDS | SERPINA7 | selected CDSs |
| CDK13 | selected CDSs | INPPL1 | selected CDSs | SERPINB3 | Whole CDS |
| CDK4 | Whole CDS | INSR | selected CDSs | SERPINB4 | Whole CDS |
| CDK6 | Whole CDS | IRF2 | Whole CDS | SETBP1 | selected CDSs |
| CDK8 | Whole CDS | IRF4 | selected CDSs | SETD2 | Whole CDS |
| CDKN1A | Whole CDS | IRF6 | selected CDSs | SETDB1 | selected CDSs |
| CDKN1B | Whole CDS | IRS1 | selected CDSs | SF1 | selected CDSs |
| CDKN2A | Whole CDS, SNP for CNV | IRS2 | Whole CDS | SF3A1 | selected CDSs |
| CDKN2B | Whole CDS | ITGB3 | selected CDSs | SF3B1 | Whole CDS |
| CDKN2C | Whole CDS | ITK | selected CDSs | SFPQ | selected CDSs |
| CEBPA | Whole CDS | ITSN1 | selected CDSs | SGCZ | selected CDSs |
| CHD1 | selected CDSs | JAK1 | Whole CDS | SGK1 | selected CDSs |
| CHD1L | selected CDSs | JAK2 | Whole CDS | SH2B3 | selected CDSs |
| CHD4 | selected CDSs | JAK3 | Whole CDS | SH2D1A | selected CDSs |
| CHD6 | selected CDSs | JARID2 | selected CDSs | SH3PXD2A | selected CDSs |
| CHD8 | selected CDSs | JUN | Whole CDS | SHH | selected CDSs |
| CHD9 | selected CDSs | KALRN | selected CDSs | SI | selected CDSs |
| CHEK1 | Whole CDS | KAT6A | selected CDSs | SIN3A | selected CDSs |
| CHEK2 | Whole CDS | KAT6B | selected CDSs | SLC16A1 | selected CDSs |
| CHFR | selected CDSs | KCNJ5 | selected CDSs | SLC1A2 | selected CDSs |
| CHI3L1 | selected CDSs | KCNQ2 | selected CDSs | SLC22A16 | selected CDSs |
| CHN1 | selected CDSs | KDM2B | selected CDSs | SLC22A18 | selected CDSs |
| CIC | Whole CDS | KDM5A | Whole CDS | SLC22A2 | selected CDSs |
| CIITA | selected CDSs | KDM5C | Whole CDS | SLC22A3 | selected CDSs |
| CLDN18 | selected CDSs | KDM6A | Whole CDS | SLC34A2 | selected CDSs,no-coding region |
| CLP1 | selected CDSs | KDR | Whole CDS, SNP for CNV | SLCO1B3 | selected CDSs |
| CLSPN | selected CDSs | KEAP1 | Whole CDS | SLIT1 | selected CDSs |
| CLTC | selected CDSs | KEL | selected CDSs | SLIT2 | selected CDSs |
| CNOT3 | selected CDSs | KIF5B | selected CDSs,no-coding region | SLX4 | Whole CDS |
| CNOT4 | selected CDSs | KIT | Whole CDS,no-coding region, SNP for CNV | SMAD2 | Whole CDS |
| CNTN1 | selected CDSs | KLF4 | selected CDSs | SMAD3 | Whole CDS |
| CNTN5 | selected CDSs | KLHL6 | selected CDSs | SMAD4 | Whole CDS |
| CNTNAP1 | selected CDSs | KLK1 | selected CDSs | SMARCA4 | Whole CDS |
| CNTNAP5 | selected CDSs | KRAS | Whole CDS, SNP for CNV | SMARCB1 | Whole CDS |
| COL1A1 | selected CDSs | KRTAP5-5 | selected CDSs | SMARCD1 | selected CDSs |
| COL2A1 | selected CDSs | L3MBTL1 | selected CDSs | SMARCE1 | selected CDSs |
| COL5A1 | selected CDSs | LAMA2 | selected CDSs | SMC1A | selected CDSs |
| COL5A2 | selected CDSs | LATS1 | selected CDSs | SMC1B | selected CDSs |
| COL5A3 | selected CDSs | LATS2 | selected CDSs | SMO | Whole CDS |
| COPS2 | selected CDSs | LCP1 | selected CDSs | SNCAIP | selected CDSs |
| CPS1 | selected CDSs | LEF1 | selected CDSs | SNTG1 | selected CDSs |
| CREBBP | Whole CDS | LGALS8 | selected CDSs | SNX29 | selected CDSs |
| CRIPAK | selected CDSs | LIFR | selected CDSs | SOCS1 | Whole CDS |
| CRKL | Whole CDS | LPHN2 | selected CDSs | SOD2 | selected CDSs |
| CRLF2 | selected CDSs | LPP | selected CDSs | SOS1 | selected CDSs |
| CRNKL1 | selected CDSs | LRP1B | Whole CDS | SOX10 | selected CDSs |
| CRTC1 | selected CDSs | LRP2 | selected CDSs | SOX17 | selected CDSs |
| CSF1 | selected CDSs | LRP4 | selected CDSs | SOX2 | Whole CDS |
| CSF1R | Whole CDS | LRP5 | selected CDSs | SOX9 | Whole CDS |
| CSF3R | selected CDSs | LRP6 | selected CDSs | SPEN | selected CDSs |
| CSMD1 | selected CDSs | LRRC7 | selected CDSs | SPOP | Whole CDS |
| CSMD3 | selected CDSs | LRRK2 | selected CDSs | SPRR3 | selected CDSs |
| CSNK1A1 | selected CDSs | LYN | selected CDSs | SPSB4 | selected CDSs |
| CSNK1G3 | selected CDSs | LZTS1 | selected CDSs | SPTA1 | selected CDSs |
| CTCF | Whole CDS | MACF1 | selected CDSs | SRC | Whole CDS |
| CTLA4 | selected CDSs | MAD1L1 | selected CDSs | SRD5A2 | selected CDSs |
| CTNNA1 | Whole CDS | MAF | Whole CDS | SRGAP1 | selected CDSs |
| CTNNA2 | selected CDSs | MAGI2 | selected CDSs | SRGAP3 | selected CDSs |
| CTNNB1 | Whole CDS | MAML2 | selected CDSs,no-coding region | SRSF2 | selected CDSs |
| CTNND1 | selected CDSs | MAML3 | selected CDSs | SRSF7 | selected CDSs |
| CUL3 | Whole CDS | MAP2K1 | Whole CDS | STAG1 | selected CDSs |
| CUX1 | selected CDSs | MAP2K2 | Whole CDS | STAG2 | Whole CDS |
| CXCR4 | selected CDSs | MAP2K4 | Whole CDS | STAT1 | selected CDSs |
| CYBA | selected CDSs | MAP3K1 | Whole CDS | STAT3 | Whole CDS |
| CYLD | Whole CDS | MAP3K13 | selected CDSs | STK11 | Whole CDS |
| CYP19A1 | selected CDSs | MAPK1 | Whole CDS | SUCLG1 | selected CDSs |
| CYP1A1 | selected CDSs | MAPK3 | selected CDSs | SUCLG2 | selected CDSs |
| CYP1B1 | selected CDSs | MAX | Whole CDS | SUFU | Whole CDS |
| CYP2A13 | selected CDSs | MCC | selected CDSs | SULT1A1 | selected CDSs |
| CYP2C8 | selected CDSs | MCL1 | Whole CDS | SUZ12 | selected CDSs |
| CYP2D6 | selected CDSs | MCM3 | selected CDSs | SVEP1 | selected CDSs |
| CYP3A4 | selected CDSs | MDC1 | selected CDSs | SYK | Whole CDS |
| CYP3A5 | selected CDSs | MDM2 | Whole CDS | SYNCRIP | selected CDSs |
| DAXX | Whole CDS | MDM4 | Whole CDS | SYNE1 | selected CDSs |
| DCC | selected CDSs | MECOM | selected CDSs | TAF1 | selected CDSs |
| DDR1 | Whole CDS | MED12 | Whole CDS | TAF15 | selected CDSs |
| DDR2 | Whole CDS | MEF2B | Whole CDS | TAF1L | selected CDSs |
| DDX3X | selected CDSs | MEF2C | selected CDSs | TAL1 | selected CDSs |
| DDX5 | selected CDSs | MEN1 | Whole CDS | TBL1XR1 | selected CDSs |
| DEK | selected CDSs | MET | Whole CDS,no-coding region, SNP for CNV | TBX15 | selected CDSs |
| DHX35 | selected CDSs | MGA | selected CDSs | TBX22 | selected CDSs |
| DHX9 | selected CDSs | MIB1 | selected CDSs | TBX3 | Whole CDS |
| DIAPH1 | selected CDSs | MIOS | selected CDSs | TCEB1 | selected CDSs |
| DICER1 | Whole CDS | MITF | Whole CDS | TCF12 | selected CDSs |
| DIS3L2 | selected CDSs | MKL1 | selected CDSs | TCF3 | selected CDSs |
| DLC1 | selected CDSs | MLH1 | Whole CDS | TCF4 | selected CDSs |
| DMD | selected CDSs | MLH3 | Whole CDS | TCF7L2 | Whole CDS |
| DNAH6 | selected CDSs | MLL | Whole CDS | TCL1A | selected CDSs |
| DNAJB1 | selected CDSs | MLL2 | Whole CDS | TEC | selected CDSs |
| DNM2 | selected CDSs | MLL3 | Whole CDS | TENM3 | selected CDSs |
| DNMT1 | selected CDSs | MLL4 | selected CDSs | TERC | Whole CDS |
| DNMT3A | Whole CDS | MLLT3 | selected CDSs | TERT | selected CDSs,no-coding region |
| DNMT3B | selected CDSs | MMP11 | selected CDSs | TET1 | selected CDSs |
| DOCK2 | selected CDSs | MMP2 | selected CDSs | TET2 | Whole CDS |
| DOCK7 | selected CDSs | MN1 | selected CDSs | TFDP1 | selected CDSs |
| DOT1L | Whole CDS | MNDA | selected CDSs | TFDP2 | selected CDSs |
| DPYD | selected CDSs | MNX1 | selected CDSs | TFE3 | selected CDSs,no-coding region |
| DRGX | selected CDSs | MPL | Whole CDS | TGFBR1 | selected CDSs |
| DTX1 | selected CDSs | MRE11A | Whole CDS | TGFBR2 | Whole CDS |
| DUSP22 | selected CDSs | MS4A1 | Whole CDS | THBS2 | selected CDSs |
| DYSF | selected CDSs | MSH2 | Whole CDS,no-coding region | TJP1 | selected CDSs |
| E2F3 | selected CDSs | MSH3 | Whole CDS | TLE1 | selected CDSs |
| EBF1 | selected CDSs | MSH4 | selected CDSs | TLL2 | selected CDSs |
| ECT2L | selected CDSs | MSH6 | Whole CDS | TLR4 | selected CDSs |
| EED | selected CDSs | MSN | selected CDSs | TLX3 | selected CDSs |
| EEF1A1 | selected CDSs | MSR1 | selected CDSs | TMEM127 | Whole CDS |
| EGFL7 | selected CDSs | MST1R | Whole CDS | TMEM132D | selected CDSs |
| EGFR | Whole CDS,no-coding region, SNP for CNV | MTHFR | selected CDSs | TMPRSS2 | Whole CDS,no-coding region |
| EGR3 | selected CDSs | MTOR | Whole CDS | TNFAIP3 | Whole CDS |
| EIF1AX | Whole CDS | MTRR | selected CDSs | TNFRSF14 | Whole CDS |
| EIF2AK3 | selected CDSs | MUC5B | selected CDSs | TNFSF11 | selected CDSs |
| EIF2C3 | selected CDSs | MUTYH | Whole CDS | TNN | selected CDSs |
| EIF3A | selected CDSs | MYC | Whole CDS,no-coding region | TOP1 | Whole CDS |
| EIF4A2 | selected CDSs | MYCL1 | Whole CDS,no-coding region | TOP2A | Whole CDS |
| EIF4G3 | selected CDSs | MYCN | Whole CDS | TP53 | Whole CDS |
| ELAC2 | selected CDSs | MYD88 | Whole CDS | TP53BP1 | selected CDSs |
| ELF1 | selected CDSs | MYH11 | selected CDSs | TP63 | selected CDSs |
| ELF3 | selected CDSs | MYH14 | selected CDSs | TP73 | selected CDSs |
| ELMO1 | selected CDSs | MYH9 | selected CDSs | TPM3 | selected CDSs,no-coding region |
| ELN | selected CDSs | MYO3A | selected CDSs | TPR | selected CDSs |
| EME2 | selected CDSs | MYOD1 | selected CDSs | TRAF2 | selected CDSs |
| EMID2 | selected CDSs | NAP1L1 | selected CDSs | TRAF7 | selected CDSs |
| EML4 | selected CDSs,no-coding region | NAV3 | selected CDSs | TRIM24 | selected CDSs |
| EP300 | Whole CDS | NBN | Whole CDS | TRIM58 | selected CDSs |
| EPAS1 | Whole CDS | NCAM2 | selected CDSs | TRIO | selected CDSs |
| EPC1 | selected CDSs | NCF2 | selected CDSs | TRPC5 | selected CDSs |
| EPCAM | Whole CDS | NCF4 | selected CDSs | TRRAP | selected CDSs |
| EPHA1 | selected CDSs | NCK1 | selected CDSs | TSC1 | Whole CDS |
| EPHA2 | Whole CDS | NCOA3 | selected CDSs | TSC2 | Whole CDS |
| EPHA3 | Whole CDS | NCOA4 | selected CDSs,no-coding region | TSHR | Whole CDS |
| EPHA4 | selected CDSs | NCOR1 | Whole CDS | TSHZ2 | selected CDSs |
| EPHA5 | Whole CDS | NCOR2 | selected CDSs | TSHZ3 | selected CDSs |
| EPHA7 | selected CDSs | NCSTN | selected CDSs | TTF1 | selected CDSs |
| EPHB1 | Whole CDS | NDUFA13 | selected CDSs | TUBA3C | selected CDSs |
| EPHB2 | selected CDSs | NF1 | Whole CDS | TUBB3 | selected CDSs |
| EPHB4 | selected CDSs | NF2 | Whole CDS | TUSC3 | selected CDSs |
| EPHB6 | Whole CDS | NFATC4 | selected CDSs | TXNIP | selected CDSs |
| EPOR | selected CDSs | NFE2L2 | Whole CDS | TYMS | selected CDSs |
| EPPK1 | selected CDSs | NFE2L3 | selected CDSs | TYR | selected CDSs |
| EPS15 | selected CDSs | NFKBIA | Whole CDS | U2AF1 | Whole CDS |
| ERBB2 | Whole CDS, SNP for CNV | NKX2-1 | Whole CDS | UBE2D2 | selected CDSs |
| ERBB2IP | selected CDSs | NKX3-1 | selected CDSs | UBR5 | selected CDSs |
| ERBB3 | Whole CDS | NLRC3 | selected CDSs | UGT1A1 | selected CDSs |
| ERBB4 | Whole CDS | NOD1 | selected CDSs | UMPS | selected CDSs |
| ERCC1 | Whole CDS | NOS3 | selected CDSs | UPF3B | selected CDSs |
| ERCC2 | selected CDSs | NOTCH1 | Whole CDS | USH2A | selected CDSs |
| ERCC3 | Whole CDS | NOTCH2 | Whole CDS,no-coding region | USP6 | selected CDSs |
| ERCC4 | Whole CDS | NOTCH3 | Whole CDS | USP8 | selected CDSs |
| ERCC5 | Whole CDS | NOTCH4 | selected CDSs | VEGFA | Whole CDS |
| ERG | Whole CDS,no-coding region | NPM1 | Whole CDS | VEZF1 | selected CDSs |
| ERRFI1 | Whole CDS | NQO1 | selected CDSs | VHL | Whole CDS |
| ESR1 | Whole CDS | NR1I2 | selected CDSs | VIM | selected CDSs |
| ESR2 | selected CDSs | NR2F2 | selected CDSs | VTCN1 | selected CDSs |
| ETS1 | selected CDSs | NR4A2 | selected CDSs | WASF3 | selected CDSs |
| ETV1 | selected CDSs | NRAS | Whole CDS | WDR90 | selected CDSs |
| ETV5 | selected CDSs | NRG1 | selected CDSs | WDTC1 | selected CDSs |
| ETV6 | selected CDSs,no-coding region | NRP2 | selected CDSs | WHSC1 | selected CDSs |
| EWSR1 | selected CDSs | NRXN1 | selected CDSs | WHSC1L1 | selected CDSs |
| EXT1 | Whole CDS | NSD1 | Whole CDS | WIPF1 | selected CDSs |
| EXT2 | Whole CDS | NTHL1 | Whole CDS | WNK1 | selected CDSs |
| EZH2 | Whole CDS | NTM | selected CDSs | WNT5A | selected CDSs |
| EZR | selected CDSs,no-coding region | NTRK1 | Whole CDS,no-coding region | WRN | Whole CDS |
| F8 | selected CDSs | NTRK2 | Whole CDS,no-coding region | WSCD2 | selected CDSs |
| FAM123B | Whole CDS | NTRK3 | Whole CDS,no-coding region | WT1 | Whole CDS |
| FAM131B | selected CDSs | NUMA1 | selected CDSs | WWOX | selected CDSs |
| FAM135B | selected CDSs | NUP107 | selected CDSs | WWP1 | selected CDSs |
| FAM157B | selected CDSs | NUP210 | selected CDSs | WWP2 | selected CDSs |
| FAM175A | Whole CDS | NUP93 | selected CDSs | XIAP | selected CDSs |
| FAM46C | selected CDSs | NUP98 | selected CDSs | XPC | selected CDSs |
| FAM5C | selected CDSs | OBSCN | selected CDSs | XPO1 | Whole CDS |
| FANCA | Whole CDS | OGDH | selected CDSs | XRCC1 | selected CDSs |
| FANCC | Whole CDS | OMD | selected CDSs | XRCC2 | Whole CDS |
| FANCD2 | Whole CDS | OPCML | selected CDSs | XRCC3 | selected CDSs |
| FANCE | Whole CDS | OR11G2 | selected CDSs | YAP1 | selected CDSs |
| FANCF | Whole CDS | OR2T4 | selected CDSs | YY1AP1 | selected CDSs |
| FANCG | Whole CDS | OR4A15 | selected CDSs | ZBTB16 | selected CDSs |
| FANCL | Whole CDS | OR4C6 | selected CDSs | ZC3H11A | selected CDSs |
| FANCM | Whole CDS | OR5L2 | selected CDSs | ZFHX3 | selected CDSs |
| FAP | selected CDSs | OR6F1 | selected CDSs | ZFP36L1 | selected CDSs |
| FAS | Whole CDS | P2RY8 | selected CDSs | ZFP36L2 | selected CDSs |
| FASLG | selected CDSs | P4HB | selected CDSs | ZFPM2 | selected CDSs |
| FAT1 | Whole CDS | PABPC1 | selected CDSs | ZIC3 | selected CDSs |
| FAT2 | Whole CDS | PABPC3 | selected CDSs | ZMAT3 | Whole CDS |
| FAT3 | selected CDSs | PAG1 | selected CDSs | ZNF217 | selected CDSs |
| FAT4 | selected CDSs | PAK1 | selected CDSs | ZNF384 | selected CDSs |
| FBXW7 | Whole CDS | PAK3 | selected CDSs | ZNF521 | selected CDSs |
| FCGR1A | selected CDSs | PALB2 | Whole CDS | ZNF638 | selected CDSs |
| FCGR2A | selected CDSs | PARK2 | Whole CDS | ZNF750 | selected CDSs |
| FCGR2B | selected CDSs | PARP1 | Whole CDS | ZNF804B | selected CDSs |
| FCGR3A | selected CDSs |  |  |  |  |

Abbreviation: CDS, Coding Sequence.

**Supplementary Table 2. Clinicopathologic features and survival outcomes in ITT and ctDNA-evaluable populations.**

| **Characteristics** | **Category** | **ITT** | | **ctDNA Analysis Population** | |
| --- | --- | --- | --- | --- | --- |
| **Bireociclib (N=204) N (%)** | **Placebo (N=101) N (%)** | **Bireociclib (N=197) N (%)** | **Placebo (N=80） N (%)** |
| Age | <65 | 161 (78.9) | 85 (84.2) | 155 (78.7) | 66 (82.5) |
|  | ≥65 | 43 (21.1) | 16 (15.8) | 42 (21.3) | 14 (17.5) |
| Age, median (range), years | / | 54.5 (32-73) | 55 (31-74) | 55 (32-73) | 54.5 (31-74) |
| ECOG performance status score | 0 | 83 (40.7) | 45 (44.6) | 81 (41.1) | 38 (47.5) |
|  | 1 | 121 (59.3) | 56 (55.4) | 116 (58.9) | 42 (52.5) |
| Menopausal status | Premenopausal or perimenopause | 75 (36.8) | 38 (37.6) | 71 (36.0) | 33 (41.2) |
|  | Postmenopausal | 129 (63.2) | 63 (62.4) | 126 (64.0) | 47 (58.8) |
| Hormone receptor status | ER+PR+ | 156 (76.5) | 72 (71.3) | 149 (75.6) | 53 (66.2) |
|  | ER+PR− | 48 (23.5) | 29 (28.7) | 48 (24.4) | 27 (33.8) |
| HER2 status | Negative | 71 (34.8) | 43 (42.6) | 65 (33.0) | 37 (46.2) |
|  | Low | 133 (65.2) | 58 (57.4) | 132 (67.0) | 43 (53.8) |
| Ki67 status | ＜15% | 47 (23.0) | 26 (25.7) | 45 (22.8) | 22 (27.5) |
|  | ≥15% | 149 (73.0) | 68 (67.3) | 145 (73.6) | 52 (65.0) |
|  | NE | 8 (3.9) | 7 (6.9) | 7 (3.6) | 6 (7.5) |
| Measurable disease | Yes | 185 (90.7) | 90 (89.1) | 180 (91.4) | 72 (90.0) |
|  | No | 19 (9.3) | 11 (10.9) | 17 (8.6) | 8 (10.0) |
| Visceral metastases | Yes | 141 (69.1) | 68 (67.3) | 138 (70.1) | 55 (68.8) |
|  | Lung | 79 (38.7) | 45 (44.6) | 78 (39.6) | 38 (47.5) |
|  | Liver | 62 (30.4) | 37 (36.6) | 60 (30.5) | 32 (40.0) |
|  | No | 63 (30.9) | 33 (32.7) | 59 (29.9) | 25 (31.2) |
|  | Bone-only | 26 (12.7) | 14 (13.9) | 23 (11.7) | 11 (13.8) |
| No. of recurrent/metastatic sites | 1 | 62 (30.4) | 33 (32.7) | 59 (29.9) | 23 (28.7) |
|  | 2 | 70 (34.3) | 27 (26.7) | 67 (34.0) | 23 (28.7) |
|  | ≥3 | 72 (35.3) | 41 (40.6) | 71 (36.0) | 34 (42.5) |
| Previous chemotherapy | Only received neoadjuvant/adjuvant chemotherapy | 129 (63.2) | 64 (63.4) | 124 (62.9) | 51 (63.7) |
|  | Received chemotherapy for metastatic disease | 47 (23.0) | 28 (27.7) | 46 (23.4) | 22 (27.5) |
|  | No previous chemotherapy | 28 (13.7) | 9 (8.9) | 27 (13.7) | 7 (8.8) |
| Previous endocrine therapy | SERM | 61 (29.9) | 28 (27.7) | 57 (28.9) | 20 (25.0) |
|  | AI | 109 (53.4) | 58 (57.4) | 107 (54.3) | 48 (60.0) |
|  | both SERM and AI | 34 (16.7) | 15 (14.9) | 33 (16.8) | 12 (15.0) |
| Endocrine therapy resistance type | Primary resistance | 54 (26.5) | 24 (23.8) | 52 (26.4) | 22 (27.5) |
|  | Acquired resistance | 150 (73.5) | 77 (76.2) | 145 (73.6) | 58 (72.5) |
| Median PFS (95%CI), months | / | 14.7 (11.1-22.9) | 7.3 (5.5-12.9) | 14.7 (11.1-20.2) | 6 (5.4-11) |
| HR (95%CI), p value | / | 0.55 (0.41-0.75), P<0.001 | | 0.48 (0.35-0.66), P<0.001 | |

Abbreviation: ITT, intention-to-treat; ctDNA, circulating tumor DNA; N/No., number; ECOG, Eastern Cooperative Oncology Group; ER, estrogen receptor; PR, progesterone receptor; HER2, epidermal growth factor receptor 2; SERM, selective estrogen receptor modulator.; AI, aromatase inhibitor; PFS, progression-free survival; CI, confidential interval; HR, hazard ratio.

**Supplementary Table 3. The univariate COX analysis of baseline characteristics and mTBI for PFS in bireociclib group.**

| **Characteristics** | **Subgroup** | **Patients** | **HR (95% CI)** | **P** |
| --- | --- | --- | --- | --- |
| Age | <65 | 119 |  |  |
|  | ≥65 | 33 | 0.67 (0.37-1.20) | 0.179 |
| ECOG | 0 | 58 |  |  |
|  | 1 | 94 | 1.63 (1.03-2.57) | 0.036 |
| Menopausal status | Premenopausal or perimenopause | 53 |  |  |
|  | postmenopausal | 99 | 1.31 (0.84-2.06) | 0.230 |
| Hormone receptor status | negative | 38 |  |  |
|  | positive | 114 | 0.64 (0.40-1.01) | 0.058 |
| HER2 status | negative | 50 |  |  |
|  | low | 102 | 1.22 (0.77-1.94) | 0.388 |
| Ki67 status | low | 28 |  |  |
|  | high | 118 | 1.86 (0.98-3.51) | 0.056 |
| Measurable disease | No | 12 |  |  |
|  | Yes | 140 | 2.96 (1.08-8.11) | 0.034 |
| Visceral metastasis | No | 44 |  |  |
|  | Yes | 108 | 2.14 (1.27-3.61) | 0.004 |
| Metastasis sites | 1 | 44 |  |  |
|  | 2 | 43 | 1.23 (0.69-2.20) | 0.481 |
|  | ≥3 | 65 | 1.71 (1.02-2.89) | 0.043 |
| Previous chemotherapy | No | 22 |  |  |
|  | Only received neoadjuvant/adjuvant chemotherapy | 91 | 0.87 (0.47-1.61) | 0.664 |
|  | Received chemotherapy for metastatic disease | 39 | 1.05 (0.53-2.06) | 0.890 |
| Previous endocrine therapy | AI | 88 |  |  |
|  | SERM | 40 | 0.47 (0.27-0.82) | 0.008 |
|  | SERM and AI | 24 | 0.95 (0.54-1.66) | 0.854 |
| Endocrine therapy resistance type | primary resistance | 39 |  |  |
|  | acquired resistance | 113 | 0.86 (0.54-1.38) | 0.538 |
| mTBI status | low | 66 |  |  |
|  | high | 86 | 2.21 (1.42-3.47) | 0.001 |

Abbreviation: HR, hazard ratio; CI, confidential interval; ECOG, Eastern Cooperative Oncology Group; mTBI, molecular tumor burden index; AI, aromatase inhibitor; SERM, selective estrogen receptor modulator.

**Supplementary Table 4. The univariate COX analysis of baseline characteristics and mTBI for PFS in placebo group.**

| Characteristics | Subgroup | Patients | HR (95% CI) | P |
| --- | --- | --- | --- | --- |
| Age | <65 | 54 |  |  |
|  | ≥65 | 13 | 1.63 (0.85-3.13) | 0.138 |
| ECOG | 0 | 30 |  |  |
|  | 1 | 37 | 1.22 (0.71-2.10) | 0.475 |
| Menopausal status | Premenopausal or perimenopause | 26 |  |  |
|  | postmenopausal | 41 | 1.05 (0.61-1.80) | 0.868 |
| Hormone receptor status | negative | 23 |  |  |
|  | positive | 44 | 0.88 (0.50-1.54) | 0.649 |
| HER2 status | negative | 29 |  |  |
|  | low | 38 | 1.14 (0.67-1.96) | 0.628 |
| Ki67 status | low | 17 |  |  |
|  | high | 46 | 1.92 (0.99-3.74) | 0.055 |
| Measurable disease | No | 6 |  |  |
|  | Yes | 61 | 0.88 (0.37-2.05) | 0.762 |
| Visceral metastasis | No | 20 |  |  |
|  | Yes | 47 | 1.37 (0.76-2.49) | 0.293 |
| Metastasis sites | 1 | 19 |  |  |
|  | 2 | 17 | 1.14 (0.53-2.45) | 0.732 |
|  | ≥3 | 31 | 1.31 (0.70-2.48) | 0.399 |
| Previous chemotherapy | No | 4 |  |  |
|  | Only received neoadjuvant/adjuvant chemotherapy | 44 | 0.49 (0.14-1.66) | 0.250 |
|  | Received chemotherapy for metastatic disease | 19 | 0.33 (0.09-1.31) | 0.115 |
| Previous endocrine therapy | AI | 41 |  |  |
|  | SERM | 16 | 0.90 (0.47-1.71) | 0.744 |
|  | SERM and AI | 10 | 0.98 (0.45-2.13) | 0.955 |
| Endocrine therapy resistance type | Primary resistance | 19 |  |  |
|  | Acquired resistance | 48 | 0.49 (0.28-0.87) | 0.015 |
| mTBI status | low | 32 |  |  |
|  | high | 35 | 1.78 (1.04-3.03) | 0.034 |

Abbreviation: HR, hazard ratio; CI, confidential interval; ECOG, Eastern Cooperative Oncology Group; mTBI, molecular tumor burden index; AI, aromatase inhibitor; SERM, selective estrogen receptor modulator.
